# Supplementary material for: Higher order structural effects stabilizing the reverse Watson–Crick Guanine-Cytosine base pair in functional RNAs
Source: PubMed Central journal article supplement (PMC3902895; doi:10.1093/nar/gkt800), 2013-10-08
Supplement: supp_gkt800_nar-01456-r-2013-File002.pdf [file supp_gkt800_nar-01456-r-2013-File002.pdf]

## Supporting Information for

# Higher Order Structural Effects Stabilizing the Reverse Watson-Crick Guanine-Cytosine Base Pair in Functional RNAs

Mohit Chawla,<sup>1</sup> Safwat Abdel-Azeim,<sup>1</sup> Romina Oliva<sup>2,\*</sup> and Luigi Cavallo<sup>1,\*</sup>

<sup>1</sup> Kaust Catalysis Center, Physical Sciences and Engineering Division, King Abdullah University of Science and Technology, Thuwal 23955-6900, Saudi Arabia. <sup>2</sup> Department of Applied Sciences, University of Naples “Parthenope”, Centro Direzionale Isola C4, I-80143, Naples, Italy

### Detailed results of quantum mechanical calculations

**GCC tWW/tSW triplet.** In this triplet, the additional cytosine uses its ‘Watson-Crick’ edge to interact with both the ‘Sugar edge’ of the guanine and the exocyclic N4 of the cytosine of the G:C trans motif, giving the following H bonds: N4-H(C)...N3(G), N2-H(G)...N3(C), and N2-H(C)...O2(C), see Figure 3a. The starting geometry for the computational studies is that observed in the tRNA<sup>Tyr</sup> structure from *T. thermophilus* (PDB ID: 1H3E). The optimized gas phase and in water geometries are quite similar to the experimental geometry, with no alteration of the X-ray observed H-bonding pattern and differences in most of the H-bond distances within 0.10 Å, see Figure 3a. Larger deviation is found for the N1-H(G)...O2(C) H-bond of the G:C W:W trans motif, which is stretched by 0.33 Å and 0.23 Å in the gas phase and in the water optimized geometries, whereas the H-bond N4-H(C)...O2(C) is reduced by 0.47 Å in both the gas phase and in water optimized geometries. Looking at the triplet geometry, the additional cytosine interacting with both bases of the G:C W:W trans motif appears to be acting as a “clamp” holding in place the G:C trans geometry. The strength of the clamping interaction between the G:C trans motif and the additional cytosine,  $E_{\text{clamp}}$ , is -24.9 kcal/mol in the gas phase and -10.6

kcal/mol in water, see Table 2, indicating that the cytosine is firmly bound to the G:C trans base pair. The interaction energy between the guanine and the cytosine in the G:C pair,  $E_{GC}$ , is -14.4 and -8.6 kcal/mol in the gas-phase and water, respectively, see Table 2. The clamping interaction is dominated by the Hartree-Fock component, which constitutes 73% of total interaction energy, indicating that the H-bonding interaction energy, consistently with literature, is mainly electrostatic in nature.

**GCU tWW/Intermediate O4(U) triplet.** The crystal structure of tRNA<sup>Glu</sup> from *T. thermophilus* was taken as a reference system for this motif (PDB ID: 1N78). The crystal geometry exhibits a H-bond between O4(U) and the exocyclic amino groups N4(C) and N2(G) of the G:C trans base pair. In addition, analysis of the PDB structure revealed the presence of a structured water involved in H-bonds with N3(U) and N3(G), and thus this water molecule was included in the calculations. The optimized structures are quite close to the experimental geometry. The larger deviations involve the N4-H(C)...O4(U), N2-H(G)...O4(C) and O-H(w)...N3(G) H-bond distances, which are elongated by 0.26/0.32/0.28 Å in the gas phase and by 0.31/0.20/0.34 Å in water, see Figure 3b. The explicit water molecule retains its structural role, by bridging the U20 and G15 residues. The structural role of this water molecule was confirmed by a gas-phase optimization of the triplet while excluding the water molecule, which resulted in a severely distorted non-coplanar geometry with formation of an artificial contact between N3(U) and N3(G). Thus, it seems that U20 and the water molecule act together as a clamp, aiding the geometric stability of G:C trans base pair motif. The computed water+U...G:C clamping interaction energy  $E_{clamp}$  is -23.8 and -10.6 kcal/mol in the gas phase and in water, respectively, while the G:C interaction energy is -13.8 and -8.5 kcal/mol in the gas phase and in water. Finally, the interaction energy between the water molecule and the triplet is -17.8 and -8.2 kcal/mol in the gas phase and in water, which indicates that the water molecule is firmly held in place.

**CGH2U(rG) tWW/tSW Motif.** This motif is only observed in the crystal structure of tRNA<sup>Ser</sup> from *T. thermophilus*, that was thus used as reference (PDB ID: 1SER). It involves a 5,6-dihydro-U residue, resulting from the post transcriptional modification of uracil, which interacts using its 'Watson-Crick' edge with the 'sugar edge' of the Guanine in the G:C W:W trans base pair, giving

the following H-bonds: N3-H(H2U)...N3(G) and N2(G)-H...O2(H2U). Gas phase optimization of the triplet motif leads to the conformational collapse of the G:C base pair into the bifurcated Ww/Bs trans geometry. Careful examination of the crystal structure revealed the presence of the ribose atom O4'(G20B) within H-bonding distance (3.47 Å) from N4(C48). Thus, ribose of G20B residue was also included in the calculations. Since H2U20A and the ribose of G20B are not covalently bonded in the model used for the QM calculations, their heavy atoms were frozen to the crystallographic position to preventing unrealistic conformational rearrangements of these groups.

Inclusion of the G20B ribose in the model resulted in the optimized geometries of the G:C pair well reproducing the experimental structure, with deviations in the H-bond distances smaller than 0.30 Å, see Figure 3c. This indicates that 5,6-di-hydro-U and the G20B ribose are acting in a concerted manner as a clamp that stabilizes the G:C trans geometry. The gas phase and in water strength of the  $E_{\text{clamp}}$  between H2U plus the G20 ribose and the G:C pair are -20.9 and -11.4 kcal/mol, respectively, while the G:C base pair energy is -13.8 and -8.6 kcal/mol in gas phase and in water respectively. To gain insight into the possible effect of the chemical modification of H2U on the geometry and stability of the G:C pair, we also examined the GCUr(G) geometry in the gas-phase by replacing H2U with the unmodified U residue. Inclusion of the unmodified residue has negligible effect on the H-bond distances, with differences less than 0.20 Å relative to the optimized geometry of the structure including the H2U residue, and with a  $E_{\text{clamp}}$  only -0.7 kcal/mol larger. This similar stabilizing behavior can be understood in terms of the involvement of the 'Watson-Crick' edge of the U base in the pairing interaction, where the H-bonding network is similar for the U and 5,6-di-hydro-U residues.

**GrCrG tWW/cSS Motif.** The instance selected as reference for this motif is G430:C234:G219 from 23S rRNA of *T. thermophilus*. In it, the G219 uses its amino group to interact with the O2 atom of C234 and with the O6 atom of G430, giving the following H-bonds: N2-H(G219)...O2(C234) and N2-H(G219)...O6(G430). In addition to that, it interacts with its 'Sugar edge' with the ribose of C234, giving the O2'-H(C234)...N3(G219) H-bond, while its ribose H-bonds to the C234 ribose, O2'-H(G219)...O2'(C234). Gas-phase optimization of this motif

without inclusion of the G219 and C234 ribose moieties resulted in a geometry inconsistent with the experimental structure, with the G:C pair reaching a Ww/Bs geometry. Inclusion of both the above ribose moieties resulted in a geometry similar to the crystallographic one, with the H-bonding pattern deviation of no more than 0.30 Å from the experimental values, see Figure 3d. The  $E_{\text{clamp}}$  of G219 with the G430:C214 W:W trans pair was estimated to be as high as -33.3 and -16.4 kcal/mol in the gas phase and in water, respectively. This high interaction energy can be explained by considering that G219 is involved in four H-bonds with the G:C W:W trans pair. Finally, the interaction energy between G and C bases of the G:C pair is -14.4 and -8.2 kcal/mol in the gas phase and in water, respectively.

**GGCU tHS/tWW/tWW Motif.** In this quartet, the additional guanine uses its N2 atom to give N2(G)-H...N7(G) and N2(G)-H...O6(G) H-bonds with the ‘Hoogsteen edge’ of the guanine in the G:C trans pair, while U utilizes its O4 atom to form N4-H(C)...O4(U) H-bond with the cytosine. However, after visual inspection of all these motifs in the available dataset, it turned out that three different conformations of the G:C trans base pair exist, with a similar surrounding interaction pattern within the GGCU motif. The first conformation is the classical G:C W:W trans geometry and we found 17 occurrences of it, see Table 1. The second conformation is the bifurcated Ww/Bs trans geometry that we already discussed, and we found 5 occurrences of this geometry. The third conformation is again a bifurcated one, but in it, instead of the O2(C), it is N3(C) that is involved in the bifurcated H-bonds with N1- and N2-H(G). It can be classified as G:C Ww/Bw trans geometry. We observed 8 occurrences of this third conformation. To understand the role of the quartet formation on the stability of the G:C trans pair, we optimized a representative of all the three conformations (G1360:C2214:G1371:U2210 from 23S rRNA of *E. coli*, PDB ID: 1VS8, 3OAS, 2AW4, respectively), by freezing the coordinates of the heavy atoms of the additional G and U residues to prevent rearrangements unfeasible in the 23S environment.

For the first representative conformation considered, with a G:C W:W trans geometry, the gas phase and in water geometry optimizations resulted in a geometry similar to the experimental one, with differences in the H-bond distances within 0.20 Å, see Figure 4a. The gas phase and in

water  $E_{\text{clamp}}$ , -21.1 and -6.4 kcal/mol, is quite high, and the geometry is consistent that of experimental with the formation of N2-H(G)...N7(G), N2-H(G)...O6(G) and N4-H(C)...O4(U) H-bonds between the G:C pair and the other bases. The interaction energy of the G:C pair instead amounts to -14.7 and -8.4 kcal/mol in the gas-phase and in water. For the second conformation, with a G:C Ww/Bs trans geometry, the gas phase optimized geometry is similar to the experimental one in the H-bonding pattern, although there is a quite severe shortening of the N1-H(G)...O2(C), and N4-H(C)...O4(U) H-bonds by 0.48 Å and 0.35 Å, respectively, see Figure 4b. In contrast, the in water optimization resulted in a rearrangement from the bifurcated G:C Ww/Bs trans geometry to the G:C W:W trans one. This is followed by the formation of an additional weak H-bond, C5(C)-H...O4(U). Also in this case the gas phase and in water  $E_{\text{clamp}}$  is quite high, -20.2 and -8.1 kcal/mol. The interaction energy of the G:C pair instead amounts to -18.3 and -9.8 kcal/mol in the gas-phase and in water. Finally, for the third conformation, both the gas phase and in water optimizations resulted in a shift from the bifurcated G:C Ww/Bw trans geometry to the G:C W:W trans geometry, with the additional formation of a H-bond between C5-H(C) and O4(U) atoms, see Figure 4c. Interestingly, test calculations in which only one base between G1371 and U2210 was included in the geometry optimization resulted in the starting C2214:G1360 W:W trans geometry to collapse into the bifurcated W:W Ww/Bs geometry, highlighting the concerted role played by G1371 and U2210, which basically tether C2214 and G1360 to the W:W trans geometry.

The  $E_{\text{clamp}}$  in the case of 2AW4, -23.4 and -8.0 kcal/mol in the gas-phase and in water, is the strongest among the three GGCU quartets. Comparison of the crystallographic structure of the three conformations indicates that the N2(G1371)-O4(U2210) distance is 11.5 Å in 1VOS, 12.7 Å in 3OAS, and 11.9 Å in 2AW4, while the angle between the C2(G1371)-N2(G1371) and O4(U2210)-C4(U2210) bonds is 94.3°, 88.6° and 89.6° in the three conformations. This highlights the impact that limited variations in the relative disposition of the two bases acting as a clamp can have on the preferred structure and the energetics of the central G:C base pair.

**Impact of ordered surrounding water molecules.** From the crystal structure database analysis, we found 160 instances where a single water molecule is present nearly coplanar and within H-

bond distance from the carbonyl groups of the G:C trans pair, specifically from the O6(G) and O2(C) atoms, see Table 1. We will call them in the following: GC tWW/wc (where 'wc' stays for water to carbonyl). Furthermore, we found 82 occurrences of a water molecule nearly coplanar and within H-bond distance from the amino groups of the G:C trans pair, specifically from N2(G) and N4(C). We will call them in the following: GC tWW/wa (where 'wa' stays for water to amino). Finally, we found 68 occurrences where two water molecules are contemporarily observed within H-bond distance and nearly co-planar with both the accessible carbonyl and the amino groups of the G:C base pair. We will call them in the following: GC tWW/wcwa (where 'wcwa' stays for water to carbonyl plus water to amino). Thus, for the subsequent QM analysis, three model systems were prepared by extracting the coordinates from the highest resolutions crystal structures corresponding to the three systems, GC tWW/wc, GC tWW/wa and GC tWW/wcwa.

**GC tWW/wc motif.** In this motif, a water molecule is acting as a donor simultaneously for both the O6(G) and O2(C) atoms of the G:C trans geometry, see Figure 5a. The fully relaxed geometries obtained from both the gas phase and in water optimizations are consistent with that of the crystal structure geometry. However, as compared to experimental geometry, the O-H(w)...O2(C) H-bond is shortened by 0.31 Å and 0.40 Å, the O-H(w)...O6(G) H-bond is elongated by 0.32 Å and 0.25 Å, and the N2-H(G)...N3(C) H-bond is elongated by 0.31 Å and 0.16 Å in gas phase and in water optimized geometries, respectively. Looking at the geometry, it is apparent that even a single water molecule is able to held in place the W:W trans geometry, mimicking the structural role played by higher order structure formation. The clamping interaction energy  $E_{\text{clamp}}$  is estimated to be -10.1 and -5.5 kcal/mol in gas phase and in water, respectively, while the interaction energy  $E_{\text{GC}}$  between the G and C bases is -14.6 and -8.3 kcal/mol in gas phase and in water, respectively.

**GC tWW/wa motif.** In this motif, a water molecule is interacting with the amino groups of the G:C W:W trans pair, specifically with the N2(G) and N4(C) atoms, see Figure 5b. In contrast to the in water optimization, where the oxygen atom of the water molecule is acting as an acceptor for both the accessible N2(G) and N4(C) donor atoms, the gas phase optimization

converged into a geometry with the following H-bonds: N4-H(C)...O(w) and O-H(w)...N2(G), where the amino atoms act as donor and acceptor, respectively, consistently with the known ability of the amino group to be a H-bond acceptor (21). Despite of this difference in the orientation of the water molecule, both the gas phase and in water optimization converged in a geometry that is quite similar to the experimental one. Nevertheless, the main point here is that a single water molecule interacting with the amino groups of both the G and C bases is again able to stabilize the W:W trans geometry. In water, the  $E_{\text{clamp}}$  for this system is slightly lower than that calculated for the GC tWW/wc one (-3.8 vs. 5.5 kcal/mol), while in the gas phase it is -2.1 kcal higher (-12.2 vs. 10.1 kcal/mol). Finally, the interaction between the G and C bases is -14.8 and -8.4 kcal/mol in gas phase and in water, respectively.

**GC tWW/wcwa motif.** At this point, it is not surprising that the geometry optimization of the G:C W:W trans pair in the presence of two water molecules, one on the carbonyl and the other on the amino side, results in a geometry similar with the experimental ones, see Figure 5c. Interestingly, the H-bonding distances in the gas phase and in water optimized geometries are highly consistent (H-bond distances within 0.01 Å). However, as compared to experimental geometry, the O(w)-H...O6(G) and O(w)-H...N2(G) H-bond is elongated by roughly 0.19 Å, while the O(w)-H...O2(C) H-bond is shortened by 0.21 Å, the N1(G)-H...O2(C) H-bond is shortened by 0.38 Å, and the O(w)H...N2(C) H-bond is shortened by 0.13 Å in the gas-phase optimized geometries. The clamping energy of the two water molecules on the G:C W:W trans pair is estimated to be -21.4 and -8.1 kcal/mol in the gas-phase and in water respectively. Not surprisingly,  $E_{\text{clamp}}$  in presence of two water molecules is approximately equal to the sum of the  $E_{\text{clamp}}$  of single water in the GC tWW/wc and GC tWW/wa systems. Finally, the interaction energy between the G and C bases is -14.7 and -6.2 kcal/mol in gas phase and in water, respectively.

**Impact of the phosphate backbone on the stability of G:C W:W trans pair.** Our analysis revealed 269 occurrences in the wwPDB, where a phosphate oxygen is found to be coplanar and within hydrogen bonding distance from the amino N4(C) and N2(G) atoms. To model this structural motif we optimized the G:C W:W trans pair in presence of the phosphate group,

using the G2564:C2510 base pair interacting with phosphate of C2508 residue, see Table 1. Of course, in this case the overall system bears a negative charge corresponding to the anionic phosphate moiety. The H-bonding arrangement in the gas phase and in water optimized geometries is in good agreement with that of the experimental geometry, with differences in the H-bonding distances within 0.20 Å, see Figure 5d. Interestingly, the gas phase and in water optimizations substantially improve the planarity of the G:C trans base pair geometry. The calculated clamping energy values are -37.7 and -7.2 kcal/mol in gas phase and in water, respectively. The large  $E_{\text{clamp}}$  value in the gas-phase is of course consequence of the strong electrostatic interaction between the anionic phosphate and the GC base pair, an effect that is largely damped by the continuum solvation model in the in water calculations. The interaction energy between G and C in the trans pair is -13.6 and -8.2 kcal/mol in gas phase and in water, respectively.

We also found 34 occurrences of the above geometry, with additional H-bonds between the carbonyl O2(C) and O6(G) atoms with a water molecule (similarly to the G:C tWW/wa system). This system was also subjected to QM calculations (see Figure 5e). The H-bonds pattern in the gas phase and in water optimized geometries is consistent with that of the experimental structure. The calculated clamping energy is as high as -48.7 and -12.9 kcal/mol in the gas-phase and in water. Finally, the interaction energy between G and C in the trans pair is -13.8 and -8.0 kcal/mol in gas phase and in water, respectively.



**Table S1.** Complete list of the occurrences in PDB structures of G:C trans base pairs involved in higher order motifs.

| <b>GCC tWW/tSW Triplet</b>                |            |              |          |          |                            |
|-------------------------------------------|------------|--------------|----------|----------|----------------------------|
|                                           | <b>PDB</b> | <b>Ch_ID</b> | <b>G</b> | <b>C</b> | <b>additional moieties</b> |
| 1                                         | 1h3e       | B            | 15       | 48       | C20                        |
| 2                                         | 1wz2       | C            | 915      | 960      | C922                       |
| 3                                         | 1wz2       | D            | 915      | 960      | C922                       |
| 4                                         | 2der       | C            | 15       | 47       | C20                        |
| 5                                         | 2der       | D            | 15       | 47       | C20                        |
| 6                                         | 2det       | C            | 15       | 47       | C20                        |
| 7                                         | 2deu       | C            | 15       | 47       | C20                        |
| 8                                         | 2zzm       | B            | 15       | 48       | C20                        |
| 9                                         | 2deu       | D            | 15       | 47       | C20                        |
| <b>GCU tWW/Intermediate-O4(U) Triplet</b> |            |              |          |          |                            |
|                                           | <b>PDB</b> | <b>Ch_ID</b> | <b>G</b> | <b>C</b> | <b>additional moieties</b> |
| 1                                         | 1g59       | B            | 515      | 548      | U519                       |
| 2                                         | 1g59       | D            | 515      | 548      | U519                       |
| 3                                         | 2cv1       | C            | 515      | 548      | U520                       |
| 4                                         | 2cv1       | D            | 515      | 548      | U520                       |
| 5                                         | 2cv2       | C            | 515      | 548      | U520                       |
| 6                                         | 2cv2       | D            | 515      | 548      | U520                       |
| 7                                         | 1n77       | C            | 515      | 548      | U520                       |
| 8                                         | 1n77       | D            | 515      | 548      | U520                       |
| 9                                         | 1n78       | C            | 515      | 548      | U520                       |
| 10                                        | 1n78       | D            | 515      | 548      | U520                       |
| <b>GCH2U tWW/tSW Triplet</b>              |            |              |          |          |                            |
|                                           | <b>PDB</b> | <b>Ch_ID</b> | <b>G</b> | <b>C</b> | <b>additional moieties</b> |
| 1                                         | 1ser       | B            | 15       | 48       | H2U 20A                    |
| <b>GCG tWW/cSS Triplet</b>                |            |              |          |          |                            |
|                                           | <b>PDB</b> | <b>Ch_ID</b> | <b>G</b> | <b>C</b> | <b>additional moieties</b> |
| 1                                         | 2j01       | A            | 234      | 430      | G219                       |
| 2                                         | 2j03       | A            | 234      | 430      | G219                       |
| 3                                         | 2v47       | A            | 234      | 430      | G219                       |
| 4                                         | 2v49       | A            | 234      | 430      | G219                       |
| 5                                         | 2wdi       | A            | 234      | 430      | G219                       |
| 6                                         | 2wdj       | A            | 234      | 430      | G219                       |
| 7                                         | 2wdl       | A            | 234      | 430      | G219                       |
| 8                                         | 2wdn       | A            | 234      | 430      | G219                       |
| 9                                         | 2wh2       | A            | 234      | 430      | G219                       |
| 10                                        | 2wh4       | A            | 234      | 430      | G219                       |
| 11                                        | 2x9s       | A            | 234      | 430      | G219                       |
| 12                                        | 2x9u       | A            | 234      | 430      | G219                       |
| 13                                        | 2xg0       | A            | 234      | 430      | G219                       |
| 14                                        | 2xg2       | A            | 234      | 430      | G219                       |
| 15                                        | 2xqe       | A            | 234      | 430      | G219                       |
| 16                                        | 2y0v       | A            | 234      | 430      | G219                       |
| 17                                        | 2y0x       | A            | 234      | 430      | G219                       |
| 18                                        | 2y0z       | A            | 234      | 430      | G219                       |

|    |      |   |     |     |      |
|----|------|---|-----|-----|------|
| 19 | 2y11 | A | 234 | 430 | G219 |
| 20 | 2y13 | A | 234 | 430 | G219 |
| 21 | 2y15 | A | 234 | 430 | G219 |
| 22 | 2y17 | A | 234 | 430 | G219 |
| 23 | 2y19 | A | 234 | 430 | G219 |
| 24 | 3d5b | A | 234 | 430 | G219 |
| 25 | 3d5d | A | 234 | 430 | G219 |
| 26 | 3flf | A | 234 | 430 | G219 |
| 27 | 3flh | A | 234 | 430 | G219 |
| 28 | 3hux | A | 234 | 430 | G219 |
| 29 | 3huz | A | 234 | 430 | G219 |
| 30 | 3i8f | A | 234 | 430 | G219 |
| 31 | 3i8i | A | 234 | 430 | G219 |
| 32 | 3i9c | A | 234 | 430 | G219 |
| 33 | 3i9e | A | 234 | 430 | G219 |
| 34 | 3kir | A | 234 | 430 | G219 |
| 35 | 3kit | A | 234 | 430 | G219 |
| 36 | 3kni | A | 234 | 430 | G219 |
| 37 | 3knk | A | 234 | 430 | G219 |
| 38 | 3knm | A | 234 | 430 | G219 |
| 39 | 3kno | A | 234 | 430 | G219 |
| 40 | 3oh5 | A | 234 | 430 | G219 |
| 41 | 3oh7 | A | 234 | 430 | G219 |
| 42 | 3ohj | A | 234 | 430 | G219 |
| 43 | 3ohk | A | 234 | 430 | G219 |
| 44 | 3ohz | A | 234 | 430 | G219 |
| 45 | 3oi1 | A | 234 | 430 | G219 |
| 46 | 3oi3 | A | 234 | 430 | G219 |
| 47 | 3oi5 | A | 234 | 430 | G219 |
| 48 | 3pyo | A | 234 | 430 | G219 |
| 49 | 3pyr | A | 234 | 430 | G219 |
| 50 | 3pyt | A | 234 | 430 | G219 |
| 51 | 3pyv | A | 234 | 430 | G219 |
| 52 | 3tve | A | 234 | 430 | G219 |
| 53 | 3tvh | A | 234 | 430 | G219 |
| 54 | 3uxq | A | 234 | 430 | G219 |
| 55 | 3tvh | A | 234 | 430 | G219 |
| 56 | 3uxq | A | 234 | 430 | G219 |
| 57 | 3uxr | A | 234 | 430 | G219 |
| 58 | 3uye | A | 234 | 430 | G219 |
| 59 | 3uyg | A | 234 | 430 | G219 |
| 60 | 3uz1 | A | 234 | 430 | G219 |
| 61 | 3uz2 | A | 234 | 430 | G219 |
| 62 | 3uz8 | A | 234 | 430 | G219 |
| 63 | 3uz9 | A | 234 | 430 | G219 |
| 64 | 3uzf | A | 234 | 430 | G219 |
| 65 | 3uzh | A | 224 | 458 | G209 |
| 66 | 3uzk | A | 234 | 430 | G219 |
| 67 | 3uzn | A | 234 | 430 | G219 |
| 68 | 3v23 | A | 234 | 430 | G219 |
| 69 | 3v25 | A | 234 | 430 | G219 |

|    |      |   |     |     |      |
|----|------|---|-----|-----|------|
| 70 | 3v27 | A | 234 | 430 | G219 |
| 71 | 3v29 | A | 234 | 430 | G219 |
| 72 | 4abs | A | 234 | 430 | G219 |
| 73 | 4dha | A | 234 | 430 | G219 |
| 74 | 4dhc | A | 234 | 430 | G219 |

---

**GGCU tHS/tWW/tWW Quartet**


---

|    | <b>PDB</b> | <b>Ch_ID</b> | <b>G</b> | <b>C</b> | <b>additional moieties</b> |
|----|------------|--------------|----------|----------|----------------------------|
| 1  | 1vs6       | B            | 1360     | 2214     | G1371,U2210                |
| 2  | 1vs8       | B            | 1360     | 2214     | G1371,U2210                |
| 3  | 2aw4       | B            | 1360     | 2214     | G1371,U2210                |
| 4  | 2awb       | B            | 1360     | 2214     | G1371,U2210                |
| 5  | 2i2t       | B            | 1360     | 2214     | G1371,U2210                |
| 6  | 2i2v       | B            | 1360     | 2214     | G1371,U2210                |
| 7  | 2qam       | B            | 1360     | 2214     | G1371,U2210                |
| 8  | 2qao       | B            | 1360     | 2214     | G1371,U2210                |
| 9  | 2qbe       | B            | 1360     | 2214     | G1371,U2210                |
| 10 | 2qbg       | B            | 1360     | 2214     | G1371,U2210                |
| 11 | 2qoz       | B            | 1360     | 2214     | G1371,U2210                |
| 12 | 2qp1       | B            | 1360     | 2214     | G1371,U2210                |
| 13 | 3df2       | B            | 1360     | 2214     | G1371,U2210                |
| 14 | 3df4       | B            | 1360     | 2214     | G1371,U2210                |
| 15 | 3i1n       | A            | 1360     | 2214     | G1371,U2210                |
| 16 | 3i1p       | A            | 1360     | 2214     | G1371,U2210                |
| 17 | 3oas       | A            | 1360     | 2214     | G1371,U2210                |
| 18 | 3oat       | A            | 1360     | 2214     | G1371,U2210                |
| 19 | 3ofc       | A            | 1360     | 2214     | G1371,U2210                |
| 20 | 3ofd       | A            | 1360     | 2214     | G1371,U2210                |
| 21 | 3ofq       | A            | 1360     | 2214     | G1371,U2210                |
| 22 | 3ofr       | A            | 1360     | 2214     | G1371,U2210                |
| 23 | 3ofz       | A            | 1360     | 2214     | G1371,U2210                |
| 24 | 3og0       | A            | 1360     | 2214     | G1371,U2210                |
| 25 | 3orb       | A            | 1360     | 2214     | G1371,U2210                |
| 26 | 3r8s       | A            | 1360     | 2214     | G1371,U2210                |
| 27 | 3r8t       | A            | 1360     | 2214     | G1371,U2210                |
| 28 | 3sgf       | A            | 1360     | 2214     | G1371,U2210                |
| 29 | 4gar       | A            | 1360     | 2214     | G1371,U2210                |
| 30 | 4gau       | A            | 1360     | 2214     | G1371,U2210                |

---

**GC WW trans/wc**


---

|    | <b>PDB</b> | <b>Ch_ID</b> | <b>G</b> | <b>C</b> | <b>additional moieties</b> |
|----|------------|--------------|----------|----------|----------------------------|
| 1  | 1c0a       | B            | 615      | 648      | HOH1291                    |
| 2  | 1evv       | A            | 15       | 48       | HOH916                     |
| 3  | 1gtr       | B            | 15       | 48       | HOH844                     |
| 4  | 1i9v       | A            | 15       | 48       | HOH118                     |
| 5  | 1j1u       | B            | 515      | 549      | HOH41                      |
| 6  | 1qrs       | B            | 15       | 48       | HOH701                     |
| 7  | 1tn1       | A            | 15       | 48       | HOH164                     |
| 8  | 1tn2       | A            | 15       | 48       | HOH164                     |
| 9  | 3foz       | C            | 15       | 48       | HOH95                      |
| 10 | 3v23       | A            | 2505     | 2610     | HOH3784                    |
| 11 | 3v2d       | A            | 2505     | 2610     | HOH5398                    |

|    |      |   |      |      |         |
|----|------|---|------|------|---------|
| 12 | 3v2f | A | 2505 | 2610 | HOH3836 |
| 13 | 1jj2 | 0 | 1377 | 1683 | HOH8555 |
| 14 | 1k73 | A | 1377 | 1683 | HOH9034 |
| 15 | 1k8a | A | 1377 | 1683 | HOH8635 |
| 16 | 1k9m | A | 1377 | 1683 | HOH9035 |
| 17 | 1kc8 | A | 1377 | 1683 | HOH9038 |
| 18 | 1kqs | 0 | 1377 | 1683 | HOH8556 |
| 19 | 1m1k | A | 1377 | 1683 | HOH8632 |
| 20 | 1m90 | A | 1377 | 1683 | HOH6783 |
| 21 | 1nji | A | 1377 | 1683 | HOH9036 |
| 22 | 1q81 | A | 1377 | 1683 | HOH3252 |
| 23 | 1q82 | A | 1377 | 1683 | HOH8555 |
| 24 | 1q86 | A | 1377 | 1683 | HOH8557 |
| 25 | 1qvf | 0 | 1377 | 1683 | HOH8554 |
| 26 | 1qvg | 0 | 1377 | 1683 | HOH3243 |
| 27 | 1s72 | 0 | 1377 | 1683 | HOH8555 |
| 28 | 1vq5 | 0 | 1377 | 1683 | HOH9357 |
| 29 | 1vq5 | 0 | 2510 | 2564 | HOH3996 |
| 30 | 1vq7 | 0 | 1377 | 1683 | HOH9356 |
| 31 | 1vq8 | 0 | 1377 | 1683 | HOH9661 |
| 32 | 1vq9 | 0 | 1377 | 1683 | HOH9659 |
| 33 | 1vqm | 0 | 1377 | 1683 | HOH9660 |
| 34 | 1vqn | 0 | 1377 | 1683 | HOH9661 |
| 35 | 1vqo | 0 | 1377 | 1683 | HOH9660 |
| 36 | 1vqp | 0 | 1377 | 1683 | HOH9660 |
| 37 | 1w2b | 0 | 1377 | 1683 | HOH6212 |
| 38 | 1yhq | 0 | 1377 | 1683 | HOH9533 |
| 39 | 1yij | 0 | 2510 | 2564 | HOH3690 |
| 40 | 1yj9 | 0 | 1377 | 1683 | HOH8858 |
| 41 | 1yjw | 0 | 1377 | 1683 | HOH7584 |
| 42 | 2otl | 0 | 1377 | 1683 | HOH9036 |
| 43 | 2qex | 0 | 1377 | 1683 | HOH3564 |
| 44 | 3cc2 | 0 | 1377 | 1683 | HOH8556 |
| 45 | 3cc4 | 0 | 1377 | 1683 | HOH9041 |
| 46 | 3cce | 0 | 1377 | 1683 | HOH9041 |
| 47 | 3cej | 0 | 1377 | 1683 | HOH9044 |
| 48 | 3ccm | 0 | 1377 | 1683 | HOH3768 |
| 49 | 3ccq | 0 | 1377 | 1683 | HOH9044 |
| 50 | 3cd6 | 0 | 1377 | 1683 | HOH9041 |
| 51 | 3cma | 0 | 1377 | 1683 | HOH2956 |
| 52 | 3cme | 0 | 1377 | 1683 | HOH2956 |
| 53 | 3cpw | 0 | 1377 | 1683 | HOH9531 |
| 54 | 3cxc | 0 | 1377 | 1683 | HOH3033 |
| 55 | 3g71 | 0 | 1377 | 1683 | HOH3056 |
| 56 | 3i56 | 0 | 1377 | 1683 | HOH3051 |
| 57 | 1ehz | A | 15   | 48   | HOH104  |
| 58 | 1jj2 | 0 | 1856 | 1873 | HOH9721 |
| 59 | 1k73 | A | 1856 | 1873 | HOH3196 |
| 60 | 1k8a | A | 1856 | 1873 | HOH9784 |
| 61 | 1k9m | A | 1856 | 1873 | HOH3190 |
| 62 | 1kc8 | A | 1856 | 1873 | HOH3195 |

|     |      |   |      |      |          |
|-----|------|---|------|------|----------|
| 63  | 1kd1 | A | 1377 | 1683 | HOH9033  |
| 64  | 1kd1 | A | 1856 | 1873 | HOH3196  |
| 65  | 1kqs | 0 | 1856 | 1873 | HOH9705  |
| 66  | 1m1k | A | 1856 | 1873 | HOH9797  |
| 67  | 1m90 | A | 1856 | 1873 | HOH9722  |
| 68  | 1n8r | A | 1377 | 1683 | HOH9438  |
| 69  | 1n8r | A | 1856 | 1873 | HOH3587  |
| 70  | 1nji | A | 1856 | 1873 | HOH3193  |
| 71  | 1q81 | A | 1856 | 1873 | HOH9712  |
| 72  | 1q82 | A | 1856 | 1873 | HOH9708  |
| 73  | 1q86 | A | 1856 | 1873 | HOH9720  |
| 74  | 1qvf | 0 | 1856 | 1873 | HOH9713  |
| 75  | 1qvg | 0 | 1856 | 1873 | HOH9703  |
| 76  | 1s72 | 0 | 1856 | 1873 | HOH9717  |
| 77  | 1vq4 | 0 | 1377 | 1683 | HOH9355  |
| 78  | 1vq4 | 0 | 1856 | 1873 | HOH3505  |
| 79  | 1vq5 | 0 | 1856 | 1873 | HOH6138  |
| 80  | 1vq6 | 0 | 1377 | 1683 | HOH9357  |
| 81  | 1vq6 | 0 | 1856 | 1873 | HOH3505  |
| 82  | 1vq7 | 0 | 1856 | 1873 | HOH6137  |
| 83  | 1vq8 | 0 | 1856 | 1873 | HOH3798  |
| 84  | 1vq9 | 0 | 1856 | 1873 | HOH3777  |
| 85  | 1vqk | 0 | 1377 | 1683 | HOH9661  |
| 86  | 1vqk | 0 | 1856 | 1873 | HOH3808  |
| 87  | 1vql | 0 | 1377 | 1683 | HOH9660  |
| 88  | 1vql | 0 | 1856 | 1873 | HOH3798  |
| 89  | 1vqm | 0 | 1856 | 1873 | HOH3803  |
| 90  | 1vqn | 0 | 1856 | 1873 | HOH3801  |
| 91  | 1vqo | 0 | 1856 | 1873 | HOH3819  |
| 92  | 1vqp | 0 | 1856 | 1873 | HOH3810  |
| 93  | 1w2b | 0 | 1856 | 1873 | HOH7128  |
| 94  | 1w2b | 0 | 2510 | 2564 | HOH8275  |
| 95  | 1yhq | 0 | 1856 | 1873 | HOH3699  |
| 96  | 1yi2 | 0 | 1377 | 1683 | HOH9033  |
| 97  | 1yij | 0 | 1377 | 1683 | HOH9034  |
| 98  | 1yj9 | 0 | 1856 | 1873 | HOH5664  |
| 99  | 1yjn | 0 | 1377 | 1683 | HOH9033  |
| 100 | 2otj | 0 | 1377 | 1683 | HOH9035  |
| 101 | 2otj | 0 | 1856 | 1873 | HOH3214  |
| 102 | 2otl | 0 | 1856 | 1873 | HOH3205  |
| 103 | 3cc2 | 0 | 1856 | 1873 | HOH9742  |
| 104 | 3cc7 | 0 | 1377 | 1683 | HOH9042  |
| 105 | 3cc7 | 0 | 1856 | 1873 | HOH5905  |
| 106 | 3cce | 0 | 1856 | 1873 | HOH3217  |
| 107 | 3ccj | 0 | 1856 | 1873 | HOH5804  |
| 108 | 3eel | 0 | 1377 | 1683 | HOH-9043 |
| 109 | 3eel | 0 | 1856 | 1873 | HOH5881  |
| 110 | 3ecm | 0 | 1856 | 1873 | HOH3222  |
| 111 | 3ccq | 0 | 1856 | 1873 | HOH5897  |
| 112 | 3ccr | 0 | 1377 | 1683 | HOH9042  |
| 113 | 3ccr | 0 | 1856 | 1873 | HOH5846  |

|     |      |   |      |      |         |
|-----|------|---|------|------|---------|
| 114 | 3ces | 0 | 1377 | 1683 | HOH9042 |
| 115 | 3ces | 0 | 1856 | 1873 | HOH5858 |
| 116 | 3ccu | 0 | 1377 | 1683 | HOH9040 |
| 117 | 3ccu | 0 | 1856 | 1873 | HOH5886 |
| 118 | 3ccv | 0 | 1377 | 1683 | HOH9039 |
| 119 | 3ccv | 0 | 1856 | 1873 | HOH5872 |
| 120 | 3cma | 0 | 1856 | 1873 | HOH4099 |
| 121 | 3cme | 0 | 1856 | 1873 | HOH4107 |
| 122 | 3cpw | 0 | 1856 | 1873 | HOH3648 |
| 123 | 3exc | 0 | 1856 | 1873 | HOH4163 |
| 124 | 3g6e | 0 | 1377 | 1683 | HOH3056 |
| 125 | 3cme | 0 | 2510 | 2564 | HOH5408 |
| 126 | 3cpw | 0 | 2510 | 2564 | HOH4116 |
| 127 | 3i56 | 0 | 2510 | 2564 | HOH8405 |
| 128 | 3g71 | 0 | 2510 | 2564 | HOH8380 |
| 129 | 3cc2 | 0 | 2510 | 2564 | HOH3235 |
| 130 | 3cc4 | 0 | 2510 | 2564 | HOH3722 |
| 131 | 3cc7 | 0 | 2510 | 2564 | HOH3715 |
| 132 | 3eel | 0 | 2510 | 2564 | HOH3705 |
| 133 | 3ccm | 0 | 2510 | 2564 | HOH4553 |
| 134 | 3ccq | 0 | 2510 | 2564 | HOH4554 |
| 135 | 3ces | 0 | 2510 | 2564 | HOH3681 |
| 136 | 2otj | 0 | 2510 | 2564 | HOH3698 |
| 137 | 2otl | 0 | 2510 | 2564 | HOH3692 |
| 138 | 1yhq | 0 | 2510 | 2564 | HOH4178 |
| 139 | 1yi2 | 0 | 2510 | 2564 | HOH3678 |
| 140 | 1yjw | 0 | 2510 | 2564 | HOH9140 |
| 141 | 1jj2 | 0 | 2510 | 2564 | HOH3208 |
| 142 | 1k73 | A | 2510 | 2564 | HOH3676 |
| 143 | 1k8a | A | 2510 | 2564 | HOH3270 |
| 144 | 1k9m | A | 2510 | 2564 | HOH3672 |
| 145 | 1kc8 | A | 2510 | 2564 | HOH3686 |
| 146 | 1kd1 | A | 2510 | 2564 | HOH3677 |
| 147 | 1kqs | 0 | 2510 | 2564 | HOH3189 |
| 148 | 1m1k | A | 2510 | 2564 | HOH3275 |
| 149 | 1m90 | A | 2510 | 2564 | HOH3209 |
| 150 | 1n8r | A | 2510 | 2564 | HOH4076 |
| 151 | 1nji | A | 2510 | 2564 | HOH3673 |
| 152 | 1q81 | A | 2510 | 2564 | HOH3194 |
| 153 | 1q82 | A | 2510 | 2564 | HOH3193 |
| 154 | 1q86 | A | 2510 | 2564 | HOH3207 |
| 155 | 1qvf | 0 | 2510 | 2564 | HOH3195 |
| 156 | 1s72 | 0 | 2510 | 2564 | HOH3203 |
| 157 | 1vq6 | 0 | 2510 | 2564 | HOH3989 |
| 158 | 1vq7 | 0 | 2510 | 2564 | HOH4005 |
| 159 | 3g6e | 0 | 1377 | 1683 | HOH3056 |
| 160 | 3cpw | 0 | 2510 | 2564 | HOH4116 |

---

**GC WW trans/wa**

---

|   | <b>PDB</b> | <b>Ch_ID</b> | <b>G</b> | <b>C</b> | <b>additional moieties</b> |
|---|------------|--------------|----------|----------|----------------------------|
| 1 | 1ehz       | A            | 15       | 48       | HOH121                     |

---

|    |      |   |      |      |         |
|----|------|---|------|------|---------|
| 2  | livs | C | 915  | 947  | HOH207  |
| 3  | livs | D | 915  | 947  | HOH127  |
| 4  | ltra | A | 15   | 48   | HOH113  |
| 5  | ljj2 | 0 | 1856 | 1873 | HOH9262 |
| 6  | lk73 | A | 1856 | 1873 | HOH9736 |
| 7  | lk8a | A | 1856 | 1873 | HOH9328 |
| 8  | lk9m | A | 1856 | 1873 | HOH9727 |
| 9  | lkc8 | A | 1856 | 1873 | HOH9734 |
| 10 | lkd1 | A | 1377 | 1683 | HOH9959 |
| 11 | lkd1 | A | 1856 | 1873 | HOH9729 |
| 12 | lkqs | 0 | 1856 | 1873 | HOH9250 |
| 13 | lm1k | A | 1856 | 1873 | HOH9333 |
| 14 | lm90 | A | 1856 | 1873 | HOH9258 |
| 15 | ln8r | A | 1377 | 1683 | HOH3358 |
| 16 | ln8r | A | 1856 | 1873 | HOH3132 |
| 17 | lnji | A | 1856 | 1873 | HOH9732 |
| 18 | lq81 | A | 1856 | 1873 | HOH9251 |
| 19 | lq82 | A | 1856 | 1873 | HOH9247 |
| 20 | lq86 | A | 1856 | 1873 | HOH9260 |
| 21 | lqvf | 0 | 1856 | 1873 | HOH9259 |
| 22 | lqvg | 0 | 1856 | 1873 | HOH9250 |
| 23 | ls72 | 0 | 1856 | 1873 | HOH9260 |
| 24 | lvq4 | 0 | 1377 | 1683 | HOH3283 |
| 25 | lvq4 | 0 | 1856 | 1873 | HOH3054 |
| 26 | lvq5 | 0 | 1856 | 1873 | HOH3060 |
| 27 | lvq6 | 0 | 1377 | 1683 | HOH3280 |
| 28 | lvq6 | 0 | 1856 | 1873 | HOH3055 |
| 29 | lvq7 | 0 | 1856 | 1873 | HOH3058 |
| 30 | lvq8 | 0 | 1856 | 1873 | HOH3355 |
| 31 | lvq9 | 0 | 1856 | 1873 | HOH3330 |
| 32 | lvqk | 0 | 1377 | 1683 | HOH3585 |
| 33 | lvqk | 0 | 1856 | 1873 | HOH3356 |
| 34 | lvql | 0 | 1377 | 1683 | HOH3575 |
| 35 | lvql | 0 | 1856 | 1873 | HOH3351 |
| 36 | lvqm | 0 | 1856 | 1873 | HOH3353 |
| 37 | lvqn | 0 | 1856 | 1873 | HOH3350 |
| 38 | lvqo | 0 | 1856 | 1873 | HOH3365 |
| 39 | lvqp | 0 | 1856 | 1873 | HOH3362 |
| 40 | lw2b | 0 | 1856 | 1873 | HOH7187 |
| 41 | lw2b | 0 | 2510 | 2564 | HOH8270 |
| 42 | lyhq | 0 | 1856 | 1873 | HOH3240 |
| 43 | lyi2 | 0 | 1377 | 1683 | HOH9974 |
| 44 | lyi2 | 0 | 1856 | 1873 | HOH9740 |
| 45 | lyij | 0 | 1377 | 1683 | HOH9975 |
| 46 | lyij | 0 | 1856 | 1873 | HOH9741 |
| 47 | lyj9 | 0 | 1856 | 1873 | HOH9556 |
| 48 | lyjn | 0 | 1377 | 1683 | HOH9974 |
| 49 | lyjn | 0 | 1856 | 1873 | HOH9742 |
| 50 | lyjw | 0 | 1856 | 1873 | HOH8034 |
| 51 | 2otj | 0 | 1377 | 1683 | HOH9982 |
| 52 | 2otj | 0 | 1856 | 1873 | HOH9748 |

|    |      |   |      |      |         |
|----|------|---|------|------|---------|
| 53 | 2otl | 0 | 1856 | 1873 | HOH9743 |
| 54 | 2qex | 0 | 1856 | 1873 | HOH9567 |
| 55 | 3cc2 | 0 | 1856 | 1873 | HOH9276 |
| 56 | 3cc4 | 0 | 1856 | 1873 | HOH9767 |
| 57 | 3cc7 | 0 | 1377 | 1683 | HOH3007 |
| 58 | 3cc7 | 0 | 1856 | 1873 | HOH9768 |
| 59 | 3cce | 0 | 1856 | 1873 | HOH9760 |
| 60 | 3ccj | 0 | 1856 | 1873 | HOH9752 |
| 61 | 3ccl | 0 | 1377 | 1683 | HOH9990 |
| 62 | 3ccl | 0 | 1856 | 1873 | HOH9753 |
| 63 | 3ccm | 0 | 1856 | 1873 | HOH9763 |
| 64 | 3ccq | 0 | 1856 | 1873 | HOH9756 |
| 65 | 3ccr | 0 | 1377 | 1683 | HOH9976 |
| 66 | 3ccr | 0 | 1856 | 1873 | HOH9750 |
| 67 | 3ccs | 0 | 1377 | 1683 | HOH9975 |
| 68 | 3ccs | 0 | 1856 | 1873 | HOH9745 |
| 69 | 3ccu | 0 | 1377 | 1683 | HOH9983 |
| 70 | 3ccu | 0 | 1856 | 1873 | HOH9751 |
| 71 | 3cev | 0 | 1377 | 1683 | HOH9981 |
| 72 | 3cev | 0 | 1856 | 1873 | HOH9748 |
| 73 | 3cd6 | 0 | 1856 | 1873 | HOH9760 |
| 74 | 3cma | 0 | 1856 | 1873 | HOH3658 |
| 75 | 3cme | 0 | 1856 | 1873 | HOH3655 |
| 76 | 3cpw | 0 | 1856 | 1873 | HOH3196 |
| 77 | 3cxc | 0 | 1856 | 1873 | HOH3712 |
| 78 | 3g4s | 0 | 1856 | 1873 | HOH5631 |
| 79 | 3g6e | 0 | 1377 | 1683 | HOH6593 |
| 80 | 3g6e | 0 | 1856 | 1873 | HOH5751 |
| 81 | 3g71 | 0 | 1856 | 1873 | HOH5840 |
| 82 | 3i56 | 0 | 1856 | 1873 | HOH5815 |

---

**GC WW trans/wcwa**

---

|    | <b>PDB</b> | <b>Ch_ID</b> | <b>G</b> | <b>C</b> | <b>additional moieties</b> |
|----|------------|--------------|----------|----------|----------------------------|
| 1  | 1ehz       | A            | 15       | 48       | HOH121, HOH104             |
| 2  | 1jj2       | 0            | 1856     | 1873     | HOH9262; HOH9721           |
| 3  | 1k73       | A            | 1856     | 1873     | HOH9736; HOH3196           |
| 4  | 1k8a       | A            | 1856     | 1873     | HOH9328; HOH9784           |
| 5  | 1k9m       | A            | 1856     | 1873     | HOH9727; HOH3190           |
| 6  | 1kc8       | A            | 1856     | 1873     | HOH9734; HOH3195           |
| 7  | 1kd1       | A            | 1377     | 1683     | HOH9959; HOH9033           |
| 8  | 1kd1       | A            | 1856     | 1873     | HOH9729; HOH3196           |
| 9  | 1kqs       | 0            | 1856     | 1873     | HOH9250; HOH9705           |
| 10 | 1m1k       | A            | 1856     | 1873     | HOH9333; HOH9797           |
| 11 | 1m90       | A            | 1856     | 1873     | HOH9258; HOH9722           |
| 12 | 1n8r       | A            | 1377     | 1683     | HOH3358; HOH9438           |
| 13 | 1n8r       | A            | 1856     | 1873     | HOH3132; HOH3587           |
| 14 | 1nji       | A            | 1856     | 1873     | HOH9732; HOH3193           |
| 15 | 1q81       | A            | 1856     | 1873     | HOH9251; HOH9712           |
| 16 | 1q82       | A            | 1856     | 1873     | HOH9247; HOH9708           |
| 17 | 1q86       | A            | 1856     | 1873     | HOH9260; HOH9720           |
| 18 | 1qvf       | 0            | 1856     | 1873     | HOH9259; HOH9713           |



|    |      |   |      |      |                   |
|----|------|---|------|------|-------------------|
| 19 | 1qvg | 0 | 1856 | 1873 | HOH9250; HOH9703  |
| 20 | 1s72 | 0 | 1856 | 1873 | HOH9260; HOH9717  |
| 21 | 1vq4 | 0 | 1377 | 1683 | HOH3283; HOH9355  |
| 22 | 1vq4 | 0 | 1856 | 1873 | HOH3054; HOH3505  |
| 23 | 1vq5 | 0 | 1856 | 1873 | HOH3060; HOH6138  |
| 24 | 1vq6 | 0 | 1377 | 1683 | HOH3280; HOH9357  |
| 25 | 1vq6 | 0 | 1856 | 1873 | HOH3055; HOH3505  |
| 26 | 1vq7 | 0 | 1856 | 1873 | HOH3058; HOH6137  |
| 27 | 1vq8 | 0 | 1856 | 1873 | HOH3355; HOH3798  |
| 28 | 1vq9 | 0 | 1856 | 1873 | HOH3330; HOH3777  |
| 29 | 1vqk | 0 | 1377 | 1683 | HOH3585; HOH9661  |
| 30 | 1vqk | 0 | 1856 | 1873 | HOH3356; HOH3808  |
| 31 | 1vql | 0 | 1377 | 1683 | HOH3575; HOH9660  |
| 32 | 1vql | 0 | 1856 | 1873 | HOH3351; HOH3798  |
| 33 | 1vqm | 0 | 1856 | 1873 | HOH3353; HOH3803  |
| 34 | 1vqn | 0 | 1856 | 1873 | HOH3350; HOH3801  |
| 35 | 1vqo | 0 | 1856 | 1873 | HOH3365; HOH3819  |
| 36 | 1vqp | 0 | 1856 | 1873 | HOH3362; HOH3810  |
| 37 | 1w2b | 0 | 1856 | 1873 | HOH7187; HOH7128  |
| 38 | 1w2b | 0 | 2510 | 2564 | HOH8270; HOH8275  |
| 39 | 1yhq | 0 | 1856 | 1873 | HOH3240; HOH3699  |
| 40 | 1yi2 | 0 | 1377 | 1683 | HOH9974; HOH9033  |
| 41 | 1yij | 0 | 1377 | 1683 | HOH9975; HOH9034  |
| 42 | 1yj9 | 0 | 1856 | 1873 | HOH9556; HOH5664  |
| 43 | 1yjn | 0 | 1377 | 1683 | HOH9974; HOH9033  |
| 44 | 2otj | 0 | 1377 | 1683 | HOH9982; HOH9035  |
| 45 | 2otj | 0 | 1856 | 1873 | HOH9748; HOH3214  |
| 46 | 2otl | 0 | 1856 | 1873 | HOH9743; HOH3205  |
| 47 | 3cc2 | 0 | 1856 | 1873 | HOH9276; HOH9742  |
| 48 | 3cc7 | 0 | 1377 | 1683 | H3007; HOH9042    |
| 49 | 3cc7 | 0 | 1856 | 1873 | HOH9768; HOH5905  |
| 50 | 3cce | 0 | 1856 | 1873 | HOH9760; HOH3217  |
| 51 | 3ccj | 0 | 1856 | 1873 | HOH9752; HOH5804  |
| 52 | 3ccl | 0 | 1377 | 1683 | HOH9990; HOH-9043 |
| 53 | 3ccl | 0 | 1856 | 1873 | HOH9753; HOH5881  |
| 54 | 3ccm | 0 | 1856 | 1873 | HOH9763; HOH3222  |
| 55 | 3ccq | 0 | 1856 | 1873 | HOH9756; HOH5897  |
| 56 | 3ccr | 0 | 1377 | 1683 | HOH9976; HOH9042  |
| 57 | 3ccr | 0 | 1856 | 1873 | HOH9750; HOH5846  |
| 58 | 3ccs | 0 | 1377 | 1683 | HOH9975; HOH9042  |
| 59 | 3ccs | 0 | 1856 | 1873 | HOH9745; HOH5858  |
| 60 | 3ccu | 0 | 1377 | 1683 | HOH9983; HOH9040  |
| 61 | 3ccu | 0 | 1856 | 1873 | HOH9751; HOH5886  |
| 62 | 3ccv | 0 | 1377 | 1683 | HOH9981; HOH9039  |
| 63 | 3ccv | 0 | 1856 | 1873 | HOH9748; HOH5872  |
| 64 | 3cma | 0 | 1856 | 1873 | HOH3658; HOH4099  |
| 65 | 3cme | 0 | 1856 | 1873 | HOH3655; HOH4107  |
| 66 | 3cpw | 0 | 1856 | 1873 | HOH3196; HOH3648  |
| 67 | 3cxc | 0 | 1856 | 1873 | HOH3712; HOH4163  |
| 68 | 3g6e | 0 | 1377 | 1683 | HOH6593; HOH3056  |

---

**GC WW trans/Ph**

---

|    | <b>PDB</b> | <b>Ch_ID</b> | <b>G</b> | <b>C</b> | <b>additional moieties</b> |
|----|------------|--------------|----------|----------|----------------------------|
| 1  | 1j5a       | A            | 1284     | 1631     | A763; OP1                  |
| 2  | 1jzx       | A            | 1284     | 1631     | A763; OP1                  |
| 3  | 1jzy       | A            | 1284     | 1631     | A763; OP1                  |
| 4  | 1k01       | A            | 1284     | 1631     | A763; OP1                  |
| 5  | 1vs6       | B            | 1271     | 1615     | A750; OP1                  |
| 6  | 1vs8       | B            | 1271     | 1615     | A750; OP1                  |
| 7  | 1vt2       | A            | 1271     | 1615     | A750; OP1                  |
| 8  | 1y69       | 0            | 1284     | 1631     | A763; OP1                  |
| 9  | 2aw4       | B            | 1271     | 1615     | A750; OP1                  |
| 10 | 2awb       | B            | 1271     | 1615     | A750; OP1                  |
| 11 | 2d3o       | 0            | 1284     | 1631     | A763; OP1                  |
| 12 | 2i2t       | B            | 1271     | 1615     | A750; OP1                  |
| 13 | 2i2v       | B            | 1271     | 1615     | A750; OP1                  |
| 14 | 2j01       | A            | 1271     | 1615     | A750; OP1                  |
| 15 | 2j03       | A            | 1271     | 1615     | A750; OP1                  |
| 16 | 2ogm       | 0            | 1284     | 1631     | A763; OP1                  |
| 17 | 2qam       | B            | 1271     | 1615     | A750; OP1                  |
| 18 | 2qao       | B            | 1271     | 1615     | A750; OP1                  |
| 19 | 2qbe       | B            | 1271     | 1615     | A750; OP1                  |
| 20 | 2qbg       | B            | 1271     | 1615     | A750; OP1                  |
| 21 | 2qoz       | B            | 1271     | 1615     | A750; OP1                  |
| 22 | 2qp1       | B            | 1271     | 1615     | A750; OP1                  |
| 23 | 2wdi       | A            | 1271     | 1615     | A750; OP1                  |
| 24 | 2wdj       | A            | 1271     | 1615     | A750; OP1                  |
| 25 | 2wdl       | A            | 1271     | 1615     | A750; OP1                  |
| 26 | 2wdn       | A            | 1271     | 1615     | A750; OP1                  |
| 27 | 2wh2       | A            | 1271     | 1615     | A750; OP1                  |
| 28 | 2wh4       | A            | 1271     | 1615     | A750; OP1                  |
| 29 | 2x9s       | A            | 1271     | 1615     | A750; OP1                  |
| 30 | 2x9u       | A            | 1271     | 1615     | A750; OP1                  |
| 31 | 2xg0       | A            | 1271     | 1615     | A750; OP1                  |
| 32 | 2xg2       | A            | 1271     | 1615     | A750; OP1                  |
| 33 | 2xqe       | A            | 1271     | 1615     | A750; OP1                  |
| 34 | 2y0v       | A            | 1271     | 1615     | A750; OP1                  |
| 35 | 2y0x       | A            | 1271     | 1615     | A750; OP1                  |
| 36 | 2y0z       | A            | 1271     | 1615     | A750; OP1                  |
| 37 | 2y11       | A            | 1271     | 1615     | A750; OP1                  |
| 38 | 2y13       | A            | 1271     | 1615     | A750; OP1                  |
| 39 | 2y15       | A            | 1271     | 1615     | A750; OP1                  |
| 40 | 2y17       | A            | 1271     | 1615     | A750; OP1                  |
| 41 | 2y19       | A            | 1271     | 1615     | A750; OP1                  |
| 42 | 2zjq       | X            | 1284     | 1631     | A763; OP1                  |
| 43 | 2zjr       | X            | 1284     | 1631     | A763; OP1                  |
| 44 | 3cf5       | X            | 1284     | 1631     | A763; OP1                  |
| 45 | 3d5b       | A            | 1271     | 1615     | A750; OP1                  |
| 46 | 3d5d       | A            | 1271     | 1615     | A750; OP1                  |
| 47 | 3df2       | B            | 1271     | 1615     | A750; OP1                  |
| 48 | 3df4       | B            | 1271     | 1615     | A750; OP1                  |

|    |      |   |      |      |           |
|----|------|---|------|------|-----------|
| 49 | 3dll | X | 1284 | 1631 | A763; OP1 |
| 50 | 3flf | A | 1271 | 1615 | A750; OP1 |
| 51 | 3flh | A | 1271 | 1615 | A750; OP1 |
| 52 | 3hux | A | 1271 | 1615 | A750; OP1 |
| 53 | 3huz | A | 1271 | 1615 | A750; OP1 |
| 54 | 3iln | A | 1271 | 1615 | A750; OP1 |
| 55 | 3ilp | A | 1271 | 1615 | A750; OP1 |
| 56 | 3i8f | A | 1271 | 1615 | A750; OP1 |
| 57 | 3i8i | A | 1271 | 1615 | A750; OP1 |
| 58 | 3i9c | A | 1271 | 1615 | A750; OP1 |
| 59 | 3i9e | A | 1271 | 1615 | A750; OP1 |
| 60 | 3kir | A | 1271 | 1615 | A750; OP1 |
| 61 | 3kit | A | 1271 | 1615 | A750; OP1 |
| 62 | 3kni | A | 1271 | 1615 | A750; OP1 |
| 63 | 3knk | A | 1271 | 1615 | A750; OP1 |
| 64 | 3knm | A | 1271 | 1615 | A750; OP1 |
| 65 | 3kno | A | 1271 | 1615 | A750; OP1 |
| 66 | 3oas | A | 1271 | 1615 | A750; OP1 |
| 67 | 3oat | A | 1271 | 1615 | A750; OP1 |
| 68 | 3ofc | A | 1271 | 1615 | A750; OP1 |
| 69 | 3ofd | A | 1271 | 1615 | A750; OP1 |
| 70 | 3ofq | A | 1271 | 1615 | A750; OP1 |
| 71 | 3ofr | A | 1271 | 1615 | A750; OP1 |
| 72 | 3ofz | A | 1271 | 1615 | A750; OP1 |
| 73 | 3og0 | A | 1271 | 1615 | A750; OP1 |
| 74 | 3oh5 | A | 1271 | 1615 | A750; OP1 |
| 75 | 3oh7 | A | 1271 | 1615 | A750; OP1 |
| 76 | 3ohj | A | 1271 | 1615 | A750; OP1 |
| 77 | 3ohk | A | 1271 | 1615 | A750; OP1 |
| 78 | 3ohz | A | 1271 | 1615 | A750; OP1 |
| 79 | 3oi1 | A | 1271 | 1615 | A750; OP1 |
| 80 | 3oi3 | A | 1271 | 1615 | A750; OP1 |
| 81 | 3oi5 | A | 1271 | 1615 | A750; OP1 |
| 82 | 3orb | A | 1271 | 1615 | A750; OP1 |
| 83 | 3pyo | A | 1271 | 1615 | A750; OP1 |
| 84 | 3pyr | A | 1271 | 1615 | A750; OP1 |
| 85 | 3pyt | A | 1271 | 1615 | A750; OP1 |
| 86 | 3pyv | A | 1271 | 1615 | A750; OP1 |
| 87 | 3r8s | A | 1271 | 1615 | A750; OP1 |
| 88 | 3r8t | A | 1271 | 1615 | A750; OP1 |
| 89 | 3sgf | A | 1271 | 1615 | A750; OP1 |
| 90 | 3tve | A | 1271 | 1615 | A750; OP1 |
| 91 | 3tvh | A | 1271 | 1615 | A750; OP1 |
| 92 | 3uxq | A | 1271 | 1615 | A750; OP1 |
| 93 | 3uxr | A | 1271 | 1615 | A750; OP1 |
| 94 | 3uye | A | 1271 | 1615 | A750; OP1 |
| 95 | 3uyg | A | 1271 | 1615 | A750; OP1 |
| 96 | 3uz1 | A | 1271 | 1615 | A750; OP1 |
| 97 | 3uz2 | A | 1271 | 1615 | A750; OP1 |
| 98 | 3uz8 | A | 1271 | 1615 | A750; OP1 |
| 99 | 3uz9 | A | 1271 | 1615 | A750; OP1 |

|     |      |   |      |      |            |
|-----|------|---|------|------|------------|
| 100 | 3uzf | A | 1271 | 1615 | A750; OP1  |
| 101 | 3uzh | A | 1318 | 1662 | OP1; A768  |
| 102 | 3uzk | A | 1271 | 1615 | A750; OP1  |
| 103 | 3uzn | A | 1271 | 1615 | A750; OP1  |
| 104 | 3v23 | A | 1271 | 1615 | A750; OP1  |
| 105 | 3v25 | A | 1271 | 1615 | A750; OP1  |
| 106 | 3v27 | A | 1271 | 1615 | A750; OP1  |
| 107 | 3v29 | A | 1271 | 1615 | A750; OP1  |
| 108 | 3v2d | A | 1271 | 1615 | A750; OP1  |
| 109 | 3v2f | A | 1271 | 1615 | A750; OP1  |
| 110 | 4abs | A | 1271 | 1615 | A750; OP1  |
| 111 | 4dha | A | 1271 | 1615 | A750; OP1  |
| 112 | 4dhc | A | 1271 | 1615 | A750; OP1  |
| 113 | 4gar | A | 1271 | 1615 | A750; OP1  |
| 114 | 4gau | A | 1271 | 1615 | A750; OP1  |
| 115 | 1ffk | 0 | 2510 | 2564 | C2508; OP1 |
| 116 | 1fg0 | A | 2510 | 2564 | C2508; OP1 |
| 117 | 1j5a | A | 2454 | 2508 | U2452; OP1 |
| 118 | 1vq4 | 0 | 2510 | 2564 | C2508; OP1 |
| 119 | 1vq8 | 0 | 2510 | 2564 | C2508; OP1 |
| 120 | 1vqk | 0 | 2510 | 2564 | C2508; OP1 |
| 121 | 1vql | 0 | 2510 | 2564 | C2508; OP1 |
| 122 | 1vqm | 0 | 2510 | 2564 | C2508; OP1 |
| 123 | 1vqn | 0 | 2510 | 2564 | C2508; OP1 |
| 124 | 1vqo | 0 | 2510 | 2564 | C2508; OP1 |
| 125 | 1vqp | 0 | 2510 | 2564 | C2508; OP1 |
| 126 | 1vs6 | B | 2475 | 2529 | U2573; OP1 |
| 127 | 1vs8 | B | 2475 | 2529 | U2573; OP1 |
| 128 | 1vt2 | A | 2475 | 2529 | U2473; OP1 |
| 129 | 1yit | 0 | 2510 | 2564 | C2508; OP1 |
| 130 | 1yj9 | 0 | 2510 | 2564 | C2508; OP1 |
| 131 | 1yjn | 0 | 2510 | 2564 | C2508; OP1 |
| 132 | 2aw4 | B | 2475 | 2529 | U2473; OP1 |
| 133 | 2awb | B | 2475 | 2529 | U2473; OP1 |
| 134 | 2i2t | B | 2475 | 2529 | U2473; OP1 |
| 135 | 2i2v | B | 2475 | 2529 | U2473; OP1 |
| 136 | 2j01 | A | 2475 | 2529 | U2473; OP1 |
| 137 | 2j03 | A | 2475 | 2529 | U2473; OP1 |
| 138 | 2qa4 | 0 | 2510 | 2564 | C2508; OP1 |
| 139 | 2qam | B | 2475 | 2529 | U2473; OP1 |
| 140 | 2qao | B | 2475 | 2529 | U2473; OP1 |
| 141 | 2qbe | B | 2475 | 2529 | U2473; OP1 |
| 142 | 2qbg | B | 2475 | 2529 | U2473; OP1 |
| 143 | 2qex | 0 | 2510 | 2564 | C2505; OP1 |
| 144 | 2qoz | B | 2475 | 2529 | U2473; OP1 |
| 145 | 2qp1 | B | 2475 | 2529 | U2473; OP1 |
| 146 | 2v47 | A | 2475 | 2529 | U2473; OP1 |
| 147 | 2v49 | A | 2475 | 2529 | U2473; OP1 |
| 148 | 2wdi | A | 2475 | 2529 | U2473; OP1 |
| 149 | 2wdj | A | 2475 | 2529 | U2473; OP1 |
| 150 | 2wdl | A | 2475 | 2529 | U2473; OP1 |

|     |      |   |      |      |            |
|-----|------|---|------|------|------------|
| 151 | 2wdn | A | 2475 | 2529 | U2473; OP1 |
| 152 | 2wh2 | A | 2475 | 2529 | U2473; OP1 |
| 153 | 2wh4 | A | 2475 | 2529 | U2473; OP1 |
| 154 | 2x9s | A | 2475 | 2529 | U2473; OP1 |
| 155 | 2x9u | A | 2475 | 2529 | U2473; OP1 |
| 156 | 2xg0 | A | 2475 | 2529 | U2473; OP1 |
| 157 | 2xqe | A | 2475 | 2529 | U2473; OP1 |
| 158 | 2y0v | A | 2475 | 2529 | U2473; OP1 |
| 159 | 2y0x | A | 2475 | 2529 | U2473; OP1 |
| 160 | 2y0z | A | 2475 | 2529 | U2473; OP1 |
| 161 | 2y11 | A | 2475 | 2529 | U2473; OP1 |
| 162 | 2y13 | A | 2475 | 2529 | U2473; OP1 |
| 163 | 2y15 | A | 2475 | 2529 | U2473; OP1 |
| 164 | 2y17 | A | 2475 | 2529 | U2473; OP1 |
| 165 | 2y19 | A | 2475 | 2529 | U2473; OP1 |
| 166 | 3g6e | 0 | 2510 | 2564 | C2508; OP1 |
| 167 | 3ccu | 0 | 2510 | 2564 | C2508; OP1 |
| 168 | 3ccv | 0 | 2510 | 2564 | C2508; OP1 |
| 169 | 3cma | 0 | 2510 | 2564 | C2508; OP1 |
| 170 | 3cme | 0 | 2510 | 2564 | C2508; OP1 |
| 171 | 3cpw | 0 | 2510 | 2564 | C2508; OP1 |
| 172 | 3i56 | 0 | 2510 | 2564 | C2508 OP1  |
| 173 | 3g71 | 0 | 2510 | 2564 | C2508 OP1  |
| 174 | 3cc2 | 0 | 2510 | 2564 | C2508; OP1 |
| 175 | 3cc4 | 0 | 2510 | 2564 | C2508; OP1 |
| 176 | 3cc7 | 0 | 2510 | 2564 | C2508; OP1 |
| 177 | 3ccl | 0 | 2510 | 2564 | C2508; OP1 |
| 178 | 3ccm | 0 | 2510 | 2564 | C2508; OP1 |
| 179 | 3ccq | 0 | 2510 | 2564 | C2508; OP1 |
| 180 | 3ccs | 0 | 2510 | 2564 | C2508; OP1 |
| 181 | 2otj | 0 | 2510 | 2564 | C2508; OP1 |
| 182 | 2otl | 0 | 2510 | 2564 | C2508; OP1 |
| 183 | 1yhq | 0 | 2510 | 2564 | C2508; OP1 |
| 184 | 1yi2 | 0 | 2510 | 2564 | C2508; OP1 |
| 185 | 1yjw | 0 | 2510 | 2564 | C2508; OP1 |
| 186 | 1jj2 | 0 | 2510 | 2564 | C2508; OP1 |
| 187 | 1k73 | A | 2510 | 2564 | C2508; OP1 |
| 188 | 1k8a | A | 2510 | 2564 | C2508; OP1 |
| 189 | 1k9m | A | 2510 | 2564 | C2508; OP1 |
| 190 | 1kc8 | A | 2510 | 2564 | C2508; OP1 |
| 191 | 1kd1 | A | 2510 | 2564 | C2508; OP1 |
| 192 | 1kqs | 0 | 2510 | 2564 | C2508; OP1 |
| 193 | 1m1k | A | 2510 | 2564 | C2508; OP1 |
| 194 | 1m90 | A | 2510 | 2564 | C2508; OP1 |
| 195 | 1n8r | A | 2510 | 2564 | C2508; OP1 |
| 196 | 1nji | A | 2510 | 2564 | C2508; OP1 |
| 197 | 1q81 | A | 2510 | 2564 | C2508; OP1 |
| 198 | 1q82 | A | 2510 | 2564 | C2508; OP1 |
| 199 | 1q86 | A | 2510 | 2564 | C2508; OP1 |
| 200 | 1qvf | 0 | 2510 | 2564 | C2508; OP1 |
| 201 | 1qvg | 0 | 2510 | 2564 | C2508; OP1 |

|     |      |   |      |      |            |
|-----|------|---|------|------|------------|
| 202 | 1s72 | 0 | 2510 | 2564 | C2508; OP1 |
| 203 | 1vq6 | 0 | 2510 | 2564 | C2508; OP1 |
| 204 | 1vq7 | 0 | 2510 | 2564 | C2508; OP1 |
| 205 | 3cce | 0 | 2510 | 2564 | C2508; OP1 |
| 206 | 3cxc | 0 | 2510 | 2564 | C2508; OP1 |
| 207 | 3d5b | A | 2475 | 2529 | U2473; OP1 |
| 208 | 3d5d | A | 2475 | 2529 | U2473; OP1 |
| 209 | 3df2 | B | 2475 | 2529 | U2473; OP1 |
| 210 | 3df4 | B | 2475 | 2529 | U2473; OP1 |
| 211 | 3flf | A | 2475 | 2529 | U2473; OP1 |
| 212 | 3flh | A | 2475 | 2529 | U2473; OP1 |
| 213 | 3hux | A | 2475 | 2529 | U2473; OP1 |
| 214 | 3huz | A | 2475 | 2529 | U2473; OP1 |
| 215 | 3iln | A | 2475 | 2529 | U2473; OP1 |
| 216 | 3ilp | A | 2475 | 2529 | U2473; OP1 |
| 217 | 3i8i | A | 2475 | 2529 | U2473; OP1 |
| 218 | 3i9e | A | 2475 | 2529 | U2473; OP1 |
| 219 | 3kir | A | 2475 | 2529 | U2473; OP1 |
| 220 | 3kit | A | 2475 | 2529 | U2473; OP1 |
| 221 | 3kni | A | 2475 | 2529 | U2473; OP1 |
| 222 | 3knk | A | 2475 | 2529 | U2473; OP1 |
| 223 | 3knm | A | 2475 | 2529 | U2473; OP1 |
| 224 | 3kno | A | 2475 | 2529 | U2473; OP1 |
| 225 | 3oas | A | 2475 | 2529 | U2473; OP1 |
| 226 | 3oat | A | 2475 | 2529 | U2473; OP1 |
| 227 | 3ofc | A | 2475 | 2529 | U2473; OP1 |
| 228 | 3ofd | A | 2475 | 2529 | U2473; OP1 |
| 229 | 3ofq | A | 2475 | 2529 | U2473; OP1 |
| 230 | 3ofr | A | 2475 | 2529 | U2473; OP1 |
| 231 | 3ofz | A | 2475 | 2529 | U2473; OP1 |
| 232 | 3og0 | A | 2475 | 2529 | U2473; OP1 |
| 233 | 3oh5 | A | 2475 | 2529 | U2473; OP1 |
| 234 | 3oh7 | A | 2475 | 2529 | U2473; OP1 |
| 235 | 3ohj | A | 2475 | 2529 | U2473; OP1 |
| 236 | 3ohk | A | 2475 | 2529 | U2473; OP1 |
| 237 | 3ohz | A | 2475 | 2529 | U2473; OP1 |
| 238 | 3oi1 | A | 2475 | 2529 | U2473; OP1 |
| 239 | 3oi3 | A | 2475 | 2529 | U2473; OP1 |
| 240 | 3oi5 | A | 2475 | 2529 | U2473; OP1 |
| 241 | 3orb | A | 2475 | 2529 | U2473; OP1 |
| 242 | 3ow2 | 0 | 2510 | 2564 | C2508; OP1 |
| 243 | 3pyo | A | 2475 | 2529 | U2473; OP1 |
| 244 | 3pyr | A | 2475 | 2529 | U2473; OP1 |
| 245 | 3pyt | A | 2475 | 2529 | U2473; OP1 |
| 246 | 3pyv | A | 2475 | 2529 | U2473; OP1 |
| 247 | 3r8s | A | 2475 | 2529 | U2473; OP1 |
| 248 | 3r8t | A | 2475 | 2529 | U2473; OP1 |
| 249 | 3sgf | A | 2475 | 2529 | U2473; OP1 |
| 250 | 3tve | A | 2475 | 2529 | U2473; OP1 |
| 251 | 3u5d | 0 | 2844 | 2898 | U2842; OP1 |
| 252 | 3u5h | 0 | 2844 | 2898 | U2842; OP1 |

|     |      |   |      |      |            |
|-----|------|---|------|------|------------|
| 253 | 3uxq | A | 2475 | 2529 | U2473; OP1 |
| 254 | 3uxr | A | 2475 | 2529 | U2473; OP1 |
| 255 | 3uye | A | 2475 | 2529 | U2473; OP1 |
| 256 | 3uz1 | A | 2475 | 2529 | U2473; OP1 |
| 257 | 3uz9 | A | 2475 | 2529 | U2473; OP1 |
| 258 | 3v2d | A | 2475 | 2529 | U2473; OP1 |
| 259 | 3v2f | A | 2475 | 2529 | U2473; OP1 |
| 260 | 4abs | A | 2475 | 2529 | U2473; OP1 |
| 261 | 4dha | A | 2475 | 2529 | U2473; OP1 |
| 262 | 4dhc | A | 2475 | 2529 | U2473; OP1 |
| 263 | 4gar | A | 2475 | 2529 | U2473; OP1 |
| 264 | 4gau | A | 2475 | 2529 | U2473; OP1 |
| 265 | 3cce | 0 | 2510 | 2564 | C2508; OP1 |
| 266 | 3cxc | 0 | 2510 | 2564 | C2508; OP1 |
| 267 | 3d5b | A | 2475 | 2529 | U2473; OP1 |
| 268 | 3cc7 | 0 | 2510 | 2564 | C2508; OP1 |
| 269 | 3ccl | 0 | 2510 | 2564 | C2508; OP1 |
| 270 | 3ccm | 0 | 2510 | 2564 | C2508; OP1 |

---

**GC WW trans/Ph-wc**

---

|    | <b>PDB</b> | <b>Ch_ID</b> | <b>G</b> | <b>C</b> | <b>additional moieties</b> |
|----|------------|--------------|----------|----------|----------------------------|
| 1  | 3g6e       | 0            | 2510     | 2564     | C2508; OP1; HOH8361        |
| 2  | 3ccu       | 0            | 2510     | 2564     | C2508; OP1; HOH3695        |
| 3  | 3ccv       | 0            | 2510     | 2564     | C2508; OP1; HOH3690        |
| 4  | 3cma       | 0            | 2510     | 2564     | C2508; OP1; HOH5399        |
| 5  | 3cme       | 0            | 2510     | 2564     | C2508; OP1; HOH5408        |
| 6  | 3cc4       | 0            | 2510     | 2564     | C2508; OP1; HOH3722        |
| 7  | 3cc7       | 0            | 2510     | 2564     | C2508; OP1; HOH3715        |
| 8  | 3ccl       | 0            | 2510     | 2564     | C2508; OP1; HOH3705        |
| 9  | 3ccm       | 0            | 2510     | 2564     | C2508; OP1; HOH4553        |
| 10 | 3ccq       | 0            | 2510     | 2564     | C2508; OP1; HOH4554        |
| 11 | 3ces       | 0            | 2510     | 2564     | C2508; OP1; HOH3681        |
| 12 | 2otj       | 0            | 2510     | 2564     | C2508; OP1; HOH3698        |
| 13 | 2otl       | 0            | 2510     | 2564     | C2508; OP1; HOH3692        |
| 14 | 1yhq       | 0            | 2510     | 2564     | C2508; OP1; HOH4178        |
| 15 | 1yi2       | 0            | 2510     | 2564     | C2508; OP1; HOH3678        |
| 16 | 1yjw       | 0            | 2510     | 2564     | C2508; OP1; HOH9140        |
| 17 | 1jj2       | 0            | 2510     | 2564     | C2508; OP1; HOH3208        |
| 18 | 1k73       | A            | 2510     | 2564     | C2508; OP1; HOH3676        |
| 19 | 1k8a       | A            | 2510     | 2564     | C2508; OP1; HOH3270        |
| 20 | 1k9m       | A            | 2510     | 2564     | C2508; OP1; HOH3672        |
| 21 | 1kc8       | A            | 2510     | 2564     | C2508; OP1; HOH3686        |
| 22 | 1kqs       | 0            | 2510     | 2564     | C2508; OP1; HOH3189        |
| 23 | 1m1k       | A            | 2510     | 2564     | C2508; OP1; HOH3275        |
| 24 | 1m90       | A            | 2510     | 2564     | C2508; OP1; HOH3209        |
| 25 | 1n8r       | A            | 2510     | 2564     | C2508; OP1; HOH4076        |
| 26 | 1nji       | A            | 2510     | 2564     | C2508; OP1; HOH3673        |
| 27 | 1q81       | A            | 2510     | 2564     | C2508; OP1; HOH3194        |
| 28 | 1q82       | A            | 2510     | 2564     | C2508; OP1; HOH3193        |
| 29 | 1q86       | A            | 2510     | 2564     | C2508; OP1; HOH3207        |
| 30 | 1qvf       | 0            | 2510     | 2564     | C2508; OP1; HOH3195        |

|    |      |   |      |      |                     |
|----|------|---|------|------|---------------------|
| 31 | 1qvg | 0 | 2510 | 2564 | C2508; OP1; HOH4000 |
| 32 | 1s72 | 0 | 2510 | 2564 | C2508; OP1; HOH3203 |
| 33 | 1vq6 | 0 | 2510 | 2564 | C2508; OP1; HOH3989 |
| 34 | 1vq7 | 0 | 2510 | 2564 | C2508; OP1; HOH4005 |

---



**Table S2.** Gas phase energy values of  $E^{\text{complex}}$ ,  $E^{\text{GC}}$  pair and  $E^{\text{surrounding}}$ . All energy values are reported in hartrees.

| Motifs                     | Ecomplex     | EGC          | Esurr        |
|----------------------------|--------------|--------------|--------------|
| GCC tWW/tSW                | -1447.723788 | -1014.253797 | -433.430338  |
| GCU tWW/Intermediate-O4(U) | -1543.933925 | -1014.425531 | -529.640718  |
| GCH2U(rG) tWW/tSW          | -1968.575016 | -1014.256121 | -954.285602  |
| GrCrG tWW/cSS              | -2435.623967 | -1434.516661 | -1001.054256 |
| GGCU(i) tHS/tWW/tWW        | -2048.353308 | -1014.256659 | -1034.063046 |
| GGCU(ii) tHS/tWW/tWW       | -2048.398868 | -1014.262053 | -1034.104641 |
| GGCU(iii) tHS/tWW/tWW      | -2048.291134 | -1014.258649 | -1033.995100 |
| GC tWW/wc                  | -1090.596221 | -1014.258186 | -76.322021   |
| GC tWW/wa                  | -1090.597034 | -1014.255676 | -76.321671   |
| GC tWW/wcwa                | -1166.935024 | -1014.257603 | -152.642978  |
| GC tWW/OP1                 | -1735.494426 | -1014.248827 | -721.185484  |
| GC tWW/OP1wc               | -1811.840961 | -1014.251779 | 797.511614   |

Gas phase and in water optimized geometries for the studied motifs:

51

```
1H3E_triplet_gas E = -1450.94343505 A.U.  
C      -5.301566      -0.473798      0.000801  
N      -0.628648      -2.432827      0.016992  
C      -1.002094      -1.118383      0.034005  
N      -0.028467      -0.201109      0.062767  
N      -2.278404      -0.733878      0.026091  
C      -3.142604      -1.775519      0.001413  
C      -2.865784      -3.136454     -0.017160  
C      -1.492558      -3.563167     -0.010363  
O      -1.027412      -4.685109     -0.024184  
N      -4.032116      -3.872302     -0.039918  
C      -4.982492      -2.985963     -0.035273  
N      -4.511750      -1.682380     -0.010328  
C       1.036960       6.023082     -0.024175  
N      -0.045953       5.046215     -0.011443  
C       0.305038       3.671829      0.000452  
O       1.502703       3.391305     -0.000294  
N      -0.693575       2.760209      0.012037  
C      -1.968914       3.130545      0.011761  
N      -2.905333       2.174225      0.022703  
C      -2.347702       4.512731      0.000386  
C      -1.347439       5.421814     -0.010898  
C       4.741520      -3.815742      0.005807  
N       4.544627      -2.369101     -0.000896  
C       3.210834      -1.891716      0.016708  
O       2.305096      -2.719978      0.036957  
N       3.007895      -0.551278      0.010373  
C       4.025277       0.298121     -0.011487  
N       3.761822       1.611756     -0.016787  
C       5.383446      -0.160224     -0.029137  
C       5.580448      -1.498706     -0.022925  
H      -5.099368       0.114375      0.897415  
H       0.954358      -0.450510      0.047643  
H      -6.041332      -3.191329     -0.048577  
H       1.665566       5.899424      0.855572  
H      -2.662622       1.171843      0.026453  
H      -3.380503       4.823136      0.000393  
H      -1.536310       6.486077     -0.020172  
H       4.294425      -4.250785      0.897307  
H       2.814118       1.980551     -0.006424  
H       6.217291       0.523460     -0.046896  
H       6.569520      -1.934741     -0.035272  
H       5.808373      -4.025420     -0.014300  
H       4.258595      -4.263320     -0.860347  
H      -5.092521       0.135938     -0.879765  
H      -6.355490      -0.743169     -0.006545  
H       0.608884       7.022609     -0.032249  
H       1.659777       5.882733     -0.905539  
H       0.370814      -2.643920      0.024402  
H       4.515024       2.273274     -0.034006
```

|   |           |          |          |
|---|-----------|----------|----------|
| H | -3.873419 | 2.436050 | 0.023260 |
| H | -0.263187 | 0.786577 | 0.057205 |

51

1H3E\_cosmo

|   |           |           |           |
|---|-----------|-----------|-----------|
| C | 4.981399  | -1.922351 | -0.096535 |
| N | -0.068938 | -2.412864 | 0.046830  |
| C | 0.682890  | -1.264230 | 0.074962  |
| N | 0.020500  | -0.106367 | 0.155522  |
| N | 2.013842  | -1.276435 | 0.035690  |
| C | 2.530027  | -2.520102 | -0.040893 |
| C | 1.853415  | -3.735107 | -0.077569 |
| C | 0.426279  | -3.725822 | -0.030616 |
| O | -0.350335 | -4.680069 | -0.050717 |
| N | 2.745651  | -4.787921 | -0.161364 |
| C | 3.920449  | -4.219352 | -0.175098 |
| N | 3.859747  | -2.842600 | -0.105085 |
| C | 0.501678  | 6.048295  | -0.161251 |
| N | 1.339360  | 4.857042  | -0.039296 |
| C | 0.712864  | 3.597422  | -0.082103 |
| O | -0.515600 | 3.559540  | -0.218137 |
| N | 1.483594  | 2.491295  | 0.027512  |
| C | 2.804824  | 2.584259  | 0.176474  |
| N | 3.504330  | 1.447255  | 0.275918  |
| C | 3.463017  | 3.849909  | 0.229766  |
| C | 2.684287  | 4.950209  | 0.116154  |
| C | -5.551777 | -2.496231 | 0.197912  |
| N | -4.965711 | -1.162055 | 0.084746  |
| C | -3.566917 | -1.047874 | 0.090417  |
| O | -2.898722 | -2.088015 | 0.189684  |
| N | -3.009590 | 0.179949  | -0.010298 |
| C | -3.773211 | 1.269434  | -0.117417 |
| N | -3.178988 | 2.462129  | -0.214866 |
| C | -5.199696 | 1.180134  | -0.128865 |
| C | -5.741998 | -0.053306 | -0.024310 |
| H | 4.891499  | -1.205340 | -0.911541 |
| H | -0.996042 | -0.066665 | 0.107107  |
| H | 4.870412  | -4.729569 | -0.235257 |
| H | -0.032106 | 6.036700  | -1.109405 |
| H | 3.035905  | 0.543909  | 0.218032  |
| H | 4.532589  | 3.931195  | 0.351388  |
| H | 3.093840  | 5.951597  | 0.143017  |
| H | -5.221796 | -3.123286 | -0.627858 |
| H | -2.169455 | 2.575487  | -0.202081 |
| H | -5.821589 | 2.058331  | -0.215490 |
| H | -6.811802 | -0.216330 | -0.022497 |
| H | -6.634066 | -2.402716 | 0.177299  |
| H | -5.241545 | -2.964920 | 1.129585  |
| H | 5.031021  | -1.384331 | 0.850021  |
| H | 5.899301  | -2.490020 | -0.226432 |
| H | 1.137797  | 6.927693  | -0.109780 |
| H | -0.230134 | 6.077090  | 0.643554  |

|   |           |           |           |
|---|-----------|-----------|-----------|
| H | -1.092214 | -2.315389 | 0.090862  |
| H | -3.741392 | 3.295033  | -0.291954 |
| H | 4.504411  | 1.481145  | 0.395388  |
| H | 0.540880  | 0.771022  | 0.106051  |

53

1N78\_triplet\_gas E = -1547.30682922 A.U.

|   |           |           |           |
|---|-----------|-----------|-----------|
| N | -1.533327 | 2.210013  | -0.127433 |
| C | -0.469445 | 1.616887  | 0.483245  |
| N | -0.638450 | 0.367585  | 0.961035  |
| N | 0.696061  | 2.229168  | 0.646437  |
| C | 0.719443  | 3.488090  | 0.145757  |
| C | -0.302248 | 4.180427  | -0.489008 |
| C | -1.572363 | 3.530207  | -0.671838 |
| O | -2.589012 | 3.937706  | -1.194174 |
| N | 0.123290  | 5.439684  | -0.855288 |
| C | 1.359642  | 5.499098  | -0.452939 |
| N | 1.790691  | 4.338822  | 0.166497  |
| N | 4.412736  | -2.961518 | -0.924637 |
| C | 4.272596  | -1.802956 | -0.146734 |
| O | 5.176577  | -1.004384 | -0.037003 |
| N | 3.043537  | -1.663290 | 0.465630  |
| C | 1.966733  | -2.529505 | 0.375441  |
| O | 0.916942  | -2.283761 | 0.973111  |
| C | 2.195251  | -3.691928 | -0.451104 |
| C | 3.389530  | -3.852438 | -1.055840 |
| N | -5.120173 | -1.536926 | -0.263390 |
| C | -3.886971 | -0.856994 | -0.108362 |
| O | -3.869727 | 0.357906  | -0.275036 |
| N | -2.792763 | -1.588093 | 0.221957  |
| C | -2.866149 | -2.896718 | 0.407588  |
| N | -1.740288 | -3.555527 | 0.730441  |
| C | -4.102506 | -3.604660 | 0.267031  |
| C | -5.191588 | -2.873742 | -0.069598 |
| O | 2.603643  | 0.703379  | 1.905595  |
| H | -1.420704 | -0.205849 | 0.654927  |
| H | 2.021714  | 6.342444  | -0.569167 |
| H | 1.400841  | -4.407268 | -0.579994 |
| H | 3.598332  | -4.705962 | -1.685430 |
| H | -1.777729 | -4.535178 | 0.940795  |
| H | -4.173682 | -4.670426 | 0.415220  |
| H | -6.166382 | -3.322356 | -0.200147 |
| H | 1.947471  | 1.315254  | 1.471904  |
| H | 2.360761  | 0.669230  | 2.834642  |
| H | -2.396568 | 1.671622  | -0.219565 |
| H | 0.185702  | -0.149849 | 1.224247  |
| H | -0.853446 | -3.066590 | 0.839310  |
| H | 2.915666  | -0.801889 | 1.028388  |
| C | 3.098820  | 4.076140  | 0.732843  |
| H | 3.038640  | 3.951445  | 1.814015  |
| H | 3.529944  | 3.170933  | 0.308104  |
| H | 3.749747  | 4.918407  | 0.509880  |
| C | -6.288798 | -0.737617 | -0.622032 |

|   |           |           |           |
|---|-----------|-----------|-----------|
| H | -6.479846 | 0.011385  | 0.143797  |
| H | -6.110509 | -0.217137 | -1.560490 |
| H | -7.148384 | -1.396250 | -0.719610 |
| C | 5.697851  | -3.149278 | -1.593689 |
| H | 5.889281  | -2.328367 | -2.282079 |
| H | 6.502607  | -3.171861 | -0.861883 |
| H | 5.671176  | -4.088009 | -2.140121 |

53

1N78\_triplet\_cosmo E = -1547.35243037 A.U.

|   |           |           |           |
|---|-----------|-----------|-----------|
| N | -2.441389 | 1.295408  | -0.055930 |
| C | -1.139485 | 1.302561  | 0.371177  |
| N | -0.612568 | 0.125937  | 0.732944  |
| N | -0.418623 | 2.415816  | 0.453093  |
| C | -1.094340 | 3.523716  | 0.080991  |
| C | -2.408052 | 3.615053  | -0.363392 |
| C | -3.186604 | 2.420153  | -0.457753 |
| O | -4.351538 | 2.288012  | -0.826439 |
| N | -2.731832 | 4.927542  | -0.650726 |
| C | -1.643490 | 5.597863  | -0.384346 |
| N | -0.608940 | 4.802360  | 0.063318  |
| N | 5.620129  | -1.112789 | -0.642194 |
| C | 4.950586  | 0.019507  | -0.189118 |
| O | 5.466893  | 1.123875  | -0.208318 |
| N | 3.674056  | -0.204461 | 0.277170  |
| C | 3.015261  | -1.421802 | 0.336247  |
| O | 1.863927  | -1.478516 | 0.784421  |
| C | 3.775021  | -2.541341 | -0.151346 |
| C | 5.027202  | -2.342003 | -0.613114 |
| N | -3.969807 | -3.523167 | -0.202631 |
| C | -3.181424 | -2.372378 | -0.053255 |
| O | -3.730111 | -1.265999 | -0.164693 |
| N | -1.862601 | -2.516186 | 0.207166  |
| C | -1.312647 | -3.725617 | 0.324515  |
| N | -0.003672 | -3.806698 | 0.586800  |
| C | -2.093639 | -4.912649 | 0.179150  |
| C | -3.410767 | -4.755021 | -0.083241 |
| O | 2.268819  | 2.078010  | 1.228161  |
| H | -1.088875 | -0.755746 | 0.531362  |
| H | -1.515688 | 6.665024  | -0.489877 |
| H | 3.334824  | -3.525761 | -0.142876 |
| H | 5.631711  | -3.157479 | -0.988557 |
| H | 0.434738  | -4.709576 | 0.680834  |
| H | -1.656031 | -5.895180 | 0.271986  |
| H | -4.078795 | -5.596861 | -0.210300 |
| H | 1.331162  | 2.245432  | 0.970442  |
| H | 2.291861  | 2.164314  | 2.190408  |
| H | -2.927394 | 0.389110  | -0.098431 |
| H | 0.378734  | 0.058985  | 0.912754  |
| H | 0.578528  | -2.977668 | 0.670433  |
| H | 3.164364  | 0.627787  | 0.614586  |
| C | 0.716030  | 5.240451  | 0.469102  |

|   |           |           |           |
|---|-----------|-----------|-----------|
| H | 1.480253  | 4.656881  | -0.039806 |
| H | 0.830260  | 6.288799  | 0.205421  |
| H | 0.847349  | 5.126496  | 1.544780  |
| C | -5.394303 | -3.354032 | -0.484748 |
| H | -5.871742 | -2.794874 | 0.317300  |
| H | -5.530322 | -2.805019 | -1.414252 |
| H | -5.850633 | -4.336417 | -0.568951 |
| C | 6.980489  | -0.928415 | -1.149936 |
| H | 6.975859  | -0.245367 | -1.996833 |
| H | 7.618582  | -0.513691 | -0.372374 |
| H | 7.365035  | -1.894858 | -1.461774 |

86

3uz2\_gas\_triplet E = -2440.91313137 A.U.

|   |           |           |           |
|---|-----------|-----------|-----------|
| C | -7.008602 | -2.801101 | 1.800841  |
| C | -6.103967 | -1.695353 | 1.304154  |
| O | -4.763033 | -1.898719 | 1.808783  |
| C | -5.904730 | -1.636670 | -0.217326 |
| O | -6.982909 | -1.203063 | -1.010162 |
| C | -4.571005 | -0.882192 | -0.330401 |
| O | -4.782169 | 0.496347  | -0.112842 |
| C | -3.796714 | -1.499542 | 0.856384  |
| N | 0.532403  | -3.098030 | -1.279431 |
| C | 0.105356  | -1.818407 | -1.079410 |
| N | 0.905704  | -0.835672 | -1.545244 |
| N | -1.047704 | -1.530173 | -0.493036 |
| C | -1.753286 | -2.637722 | -0.125412 |
| C | -1.400202 | -3.971658 | -0.289025 |
| C | -0.150324 | -4.298128 | -0.916272 |
| O | 0.357401  | -5.373047 | -1.151826 |
| N | -2.372615 | -4.800580 | 0.220748  |
| C | -3.290106 | -3.997523 | 0.674336  |
| N | -2.979042 | -2.658316 | 0.492258  |
| C | -2.960512 | 5.377990  | -0.890584 |
| C | -2.489445 | 3.942479  | -0.927999 |
| O | -1.244884 | 3.839928  | -1.669314 |
| C | -2.163679 | 3.309424  | 0.423411  |
| O | -3.348844 | 2.921129  | 1.056519  |
| C | -1.201016 | 2.170766  | 0.014965  |
| O | -1.966541 | 1.126935  | -0.532945 |
| C | -0.392097 | 2.888794  | -1.094455 |
| N | 0.833668  | 3.591267  | -0.570935 |
| C | 1.932068  | 2.806569  | -0.170620 |
| O | 1.843217  | 1.577928  | -0.236794 |
| N | 3.048220  | 3.433795  | 0.278458  |
| C | 3.123369  | 4.755436  | 0.289379  |
| N | 4.266115  | 5.312400  | 0.745446  |
| C | 2.047589  | 5.576144  | -0.148949 |
| C | 0.928448  | 4.940542  | -0.574411 |
| N | 4.290446  | -0.249390 | -0.027602 |
| C | 5.148899  | 0.141174  | 0.966486  |
| N | 4.808202  | 1.260074  | 1.658664  |

|   |           |           |           |
|---|-----------|-----------|-----------|
| N | 6.235169  | -0.521548 | 1.288111  |
| C | 6.414934  | -1.631891 | 0.544089  |
| C | 5.621274  | -2.117821 | -0.491941 |
| C | 4.439612  | -1.399493 | -0.836895 |
| O | 3.598892  | -1.659903 | -1.696199 |
| N | 6.152085  | -3.280986 | -1.006628 |
| C | 7.227551  | -3.486989 | -0.303342 |
| N | 7.449206  | -2.518702 | 0.660802  |
| H | -7.032210 | -2.822797 | 2.890242  |
| H | -8.024325 | -2.638090 | 1.438201  |
| H | -6.456848 | -0.729074 | 1.672010  |
| H | -5.717610 | -2.656481 | -0.563011 |
| H | -4.066794 | -1.067987 | -1.280689 |
| H | -3.926775 | 0.950717  | -0.180707 |
| H | -3.129093 | -0.757004 | 1.294808  |
| H | 1.878443  | -1.076279 | -1.742506 |
| H | -4.195101 | -4.290984 | 1.173547  |
| H | -3.913121 | 5.427293  | -0.362948 |
| H | -3.108504 | 5.763186  | -1.898953 |
| H | -3.233134 | 3.319410  | -1.428315 |
| H | -1.615486 | 4.029450  | 1.048290  |
| H | -0.555936 | 1.826265  | 0.822172  |
| H | -1.533697 | 0.234048  | -0.477829 |
| H | -0.048409 | 2.184513  | -1.848601 |
| H | 5.055647  | 4.716003  | 0.920368  |
| H | 2.112709  | 6.652370  | -0.160749 |
| H | 0.066216  | 5.461759  | -0.956069 |
| H | 5.506772  | 1.581620  | 2.305212  |
| H | 7.906080  | -4.316279 | -0.425697 |
| H | -6.673064 | -3.774828 | 1.442197  |
| H | -2.248439 | 6.021990  | -0.371091 |
| C | -3.193393 | 2.503247  | 2.403155  |
| H | -4.186440 | 2.263439  | 2.773043  |
| H | -2.563092 | 1.613088  | 2.482412  |
| H | -2.759707 | 3.302099  | 3.015159  |
| C | -7.680720 | -0.013289 | -0.652009 |
| H | -8.413795 | 0.140701  | -1.441773 |
| H | -8.216937 | -0.126657 | 0.295527  |
| H | -7.018921 | 0.847635  | -0.591206 |
| H | 3.450274  | 0.308081  | -0.176898 |
| H | 4.198578  | 1.953535  | 1.237156  |
| H | 4.423691  | 6.299671  | 0.665233  |
| H | 0.800854  | 0.072139  | -1.120758 |
| H | 1.446870  | -3.240059 | -1.690190 |
| C | 8.539173  | -2.450126 | 1.615502  |
| H | 9.499548  | -2.415500 | 1.101514  |
| H | 8.416232  | -1.543584 | 2.201608  |
| H | 8.522642  | -3.310598 | 2.284339  |

86

3uz2\_cosmo\_triplet E = -2440.99600474 A.U.

|   |           |           |          |
|---|-----------|-----------|----------|
| C | -7.059409 | -2.634960 | 2.099542 |
|---|-----------|-----------|----------|

|   |           |           |           |
|---|-----------|-----------|-----------|
| C | -6.124436 | -1.584454 | 1.543951  |
| O | -4.755275 | -1.929260 | 1.883613  |
| C | -6.084717 | -1.473905 | 0.013230  |
| O | -7.184678 | -0.871941 | -0.639136 |
| C | -4.702991 | -0.850986 | -0.240538 |
| O | -4.756239 | 0.545106  | -0.028544 |
| C | -3.862159 | -1.542401 | 0.856394  |
| N | 0.398883  | -3.302513 | -1.284330 |
| C | 0.082273  | -2.009614 | -0.947655 |
| N | 0.990918  | -1.069258 | -1.235557 |
| N | -1.079122 | -1.684555 | -0.392087 |
| C | -1.891350 | -2.746154 | -0.183970 |
| C | -1.647634 | -4.080911 | -0.491258 |
| C | -0.409148 | -4.436479 | -1.097772 |
| O | -0.006217 | -5.546236 | -1.445230 |
| N | -2.717972 | -4.871584 | -0.122669 |
| C | -3.582356 | -4.037202 | 0.388743  |
| N | -3.140065 | -2.728887 | 0.383496  |
| C | -2.722920 | 5.342850  | -1.569334 |
| C | -2.322047 | 3.899525  | -1.369698 |
| O | -1.004420 | 3.659659  | -1.938115 |
| C | -2.177296 | 3.434120  | 0.078778  |
| O | -3.438720 | 3.168501  | 0.636671  |
| C | -1.235463 | 2.223188  | -0.068686 |
| O | -1.991647 | 1.130781  | -0.568980 |
| C | -0.268646 | 2.754407  | -1.149913 |
| N | 0.922966  | 3.447442  | -0.570057 |
| C | 1.976409  | 2.660616  | -0.087602 |
| O | 1.885996  | 1.420508  | -0.158923 |
| N | 3.058098  | 3.266541  | 0.442819  |
| C | 3.143920  | 4.596928  | 0.489696  |
| N | 4.240538  | 5.138435  | 1.028994  |
| C | 2.102734  | 5.424654  | -0.020891 |
| C | 1.019692  | 4.802937  | -0.539141 |
| N | 4.420899  | -0.210269 | 0.038943  |
| C | 5.269591  | 0.182031  | 1.047426  |
| N | 4.909908  | 1.274686  | 1.750409  |
| N | 6.371820  | -0.476547 | 1.358537  |
| C | 6.578542  | -1.562227 | 0.591002  |
| C | 5.793140  | -2.033121 | -0.457340 |
| C | 4.607851  | -1.324388 | -0.788662 |
| O | 3.786347  | -1.591499 | -1.679560 |
| N | 6.347702  | -3.176338 | -1.003537 |
| C | 7.431025  | -3.376949 | -0.298572 |
| N | 7.627510  | -2.433188 | 0.684094  |
| H | -6.964032 | -2.701065 | 3.183494  |
| H | -8.091316 | -2.369463 | 1.866498  |
| H | -6.344056 | -0.612893 | 1.990494  |
| H | -6.052362 | -2.488947 | -0.389139 |
| H | -4.320902 | -1.085966 | -1.235649 |
| H | -3.865164 | 0.917145  | -0.167128 |
| H | -3.110095 | -0.858238 | 1.247394  |
| H | 1.949015  | -1.324111 | -1.472680 |



|   |           |           |           |
|---|-----------|-----------|-----------|
| H | -4.541935 | -4.299756 | 0.798171  |
| H | -3.728547 | 5.493913  | -1.175083 |
| H | -2.734730 | 5.595223  | -2.629641 |
| H | -3.033062 | 3.243762  | -1.878012 |
| H | -1.664006 | 4.205864  | 0.663918  |
| H | -0.714515 | 1.957770  | 0.848679  |
| H | -1.534661 | 0.276041  | -0.429818 |
| H | 0.115134  | 1.946296  | -1.766420 |
| H | 4.981704  | 4.548298  | 1.368269  |
| H | 2.174875  | 6.500389  | -0.003311 |
| H | 0.191959  | 5.344071  | -0.964880 |
| H | 5.601644  | 1.631320  | 2.389422  |
| H | 8.131230  | -4.185675 | -0.434884 |
| H | -6.846585 | -3.613047 | 1.666206  |
| H | -2.043755 | 6.021578  | -1.052350 |
| C | -3.423225 | 3.024486  | 2.055474  |
| H | -4.454667 | 2.886153  | 2.370004  |
| H | -2.834875 | 2.156775  | 2.363519  |
| H | -3.014710 | 3.920811  | 2.530640  |
| C | -7.798258 | 0.279314  | -0.050042 |
| H | -8.549460 | 0.608172  | -0.765551 |
| H | -8.297486 | 0.030827  | 0.889132  |
| H | -7.084021 | 1.082184  | 0.118163  |
| H | 3.567866  | 0.336967  | -0.107494 |
| H | 4.263302  | 1.953077  | 1.343394  |
| H | 4.355551  | 6.135783  | 1.079969  |
| H | 0.893256  | -0.154694 | -0.814800 |
| H | 1.301789  | -3.482082 | -1.704336 |
| C | 8.728373  | -2.370937 | 1.633072  |
| H | 9.284013  | -1.443440 | 1.505866  |
| H | 8.350010  | -2.424085 | 2.652397  |
| H | 9.388853  | -3.213856 | 1.450374  |

76

1SER\_gas\_quartet E = -1959.53452383 A.U.

|   |          |           |           |
|---|----------|-----------|-----------|
| N | 3.697903 | 2.170218  | -0.170597 |
| C | 3.326998 | 0.938462  | -0.629959 |
| N | 2.047126 | 0.791344  | -1.022554 |
| N | 4.168159 | -0.082570 | -0.727104 |
| C | 5.438694 | 0.251232  | -0.384484 |
| C | 5.918942 | 1.469210  | 0.085520  |
| C | 5.002782 | 2.564605  | 0.242615  |
| O | 5.193288 | 3.695558  | 0.644855  |
| N | 7.277719 | 1.403626  | 0.307032  |
| C | 7.603797 | 0.188014  | -0.025347 |
| N | 6.531408 | -0.569780 | -0.456994 |
| N | 0.765639 | -3.991278 | -0.184544 |
| C | 1.350043 | -2.757557 | -0.415406 |
| O | 0.821378 | -1.847673 | -1.056394 |
| N | 2.626913 | -2.624808 | 0.112766  |
| C | 3.242434 | -3.501530 | 1.006302  |
| O | 4.455094 | -3.485151 | 1.186408  |

|   |           |           |           |
|---|-----------|-----------|-----------|
| C | 2.333407  | -4.404209 | 1.651455  |
| C | 1.492817  | -5.035996 | 0.574804  |
| C | -5.171489 | -1.549525 | -0.204038 |
| O | -5.140766 | -0.217865 | -0.710516 |
| C | -6.537472 | -1.713123 | 0.427353  |
| O | -6.303603 | -1.362614 | 1.784973  |
| C | -7.389166 | -0.652538 | -0.295590 |
| O | -8.506280 | -0.255989 | 0.529636  |
| C | -6.391661 | 0.450658  | -0.450466 |
| N | -0.957276 | 4.555167  | 0.504950  |
| C | -0.026256 | 3.563651  | 0.102004  |
| O | 1.164138  | 3.852345  | 0.097697  |
| N | -0.510061 | 2.347474  | -0.260351 |
| C | -1.805285 | 2.087623  | -0.239490 |
| N | -2.205909 | 0.852759  | -0.601137 |
| C | -2.765211 | 3.069358  | 0.162068  |
| C | -2.281135 | 4.282648  | 0.522467  |
| H | 1.341486  | 1.461799  | -0.746506 |
| H | 8.596281  | -0.232255 | 0.014966  |
| H | 3.215240  | -1.880669 | -0.293287 |
| H | 1.708973  | -3.867981 | 2.358446  |
| H | 2.170717  | -5.498027 | -0.111799 |
| H | 0.750738  | -5.625216 | 1.072328  |
| H | -4.429283 | -1.763696 | 0.536347  |
| H | -7.009597 | -2.671262 | 0.364329  |
| H | -7.828563 | -0.971175 | -1.217713 |
| H | -8.946046 | 0.498880  | 0.131665  |
| H | -6.548404 | 1.035937  | 0.431460  |
| H | -3.181824 | 0.614593  | -0.699349 |
| H | -3.822512 | 2.862172  | 0.186381  |
| H | -2.928758 | 5.087255  | 0.841644  |
| C | -0.591302 | -4.236136 | -0.640504 |
| H | -1.275247 | -3.557060 | -0.162702 |
| H | -0.661220 | -4.109024 | -1.702631 |
| H | -0.888938 | -5.245236 | -0.394868 |
| C | 6.566506  | -1.936989 | -0.938598 |
| H | 6.010415  | -2.595440 | -0.274220 |
| H | 6.140888  | -1.992949 | -1.940867 |
| H | 7.604483  | -2.260691 | -0.980540 |
| C | -0.423141 | 5.858320  | 0.892322  |
| H | 0.271751  | 5.744675  | 1.721621  |
| H | 0.120603  | 6.301473  | 0.060583  |
| H | -1.247767 | 6.504340  | 1.183524  |
| C | -4.892838 | -2.511057 | -1.374222 |
| H | -4.058707 | -2.151950 | -1.940063 |
| H | -4.670809 | -3.484912 | -0.990526 |
| H | -5.755383 | -2.564419 | -2.005152 |
| C | -5.001374 | -0.785304 | 1.910701  |
| H | -4.817962 | -0.538754 | 2.935611  |
| H | -4.266309 | -1.486938 | 1.575585  |
| H | -4.945443 | 0.101743  | 1.314937  |
| H | 1.717507  | -0.148993 | -1.197073 |
| H | -1.504914 | 0.202124  | -0.916435 |

|   |           |           |           |
|---|-----------|-----------|-----------|
| H | 2.979586  | 2.887133  | -0.096939 |
| H | 2.888134  | -5.154394 | 2.195234  |
| C | -6.470264 | 1.441922  | -1.626391 |
| H | -7.267315 | 2.135130  | -1.455861 |
| H | -5.545574 | 1.974316  | -1.706511 |
| H | -6.652512 | 0.905075  | -2.533850 |

76

1SER\_cosmo\_quartet E = -1973.12160677 A.U.

|   |           |           |           |
|---|-----------|-----------|-----------|
| N | 3.280569  | 2.182340  | -0.095185 |
| C | 2.997566  | 0.849048  | -0.254384 |
| N | 1.717206  | 0.475774  | -0.132300 |
| N | 3.934495  | -0.060706 | -0.505937 |
| C | 5.173764  | 0.463098  | -0.606360 |
| C | 5.554900  | 1.793296  | -0.461207 |
| C | 4.553062  | 2.765882  | -0.177065 |
| O | 4.689294  | 3.982073  | -0.014157 |
| N | 6.918800  | 1.930751  | -0.644297 |
| C | 7.335099  | 0.716343  | -0.893986 |
| N | 6.325735  | -0.219690 | -0.885355 |
| N | 1.347959  | -4.467332 | 0.139768  |
| C | 1.796736  | -3.225312 | -0.123667 |
| O | 1.161046  | -2.371854 | -0.751343 |
| N | 3.071483  | -2.902452 | 0.359169  |
| C | 3.803997  | -3.615883 | 1.271899  |
| O | 4.878415  | -3.205677 | 1.686061  |
| C | 3.161727  | -4.896164 | 1.736430  |
| C | 2.253117  | -5.487595 | 0.671301  |
| C | -5.673703 | -0.117933 | -1.380333 |
| O | -5.116478 | 0.300764  | -0.107685 |
| C | -7.003913 | -0.843230 | -1.061410 |
| O | -7.076601 | -2.178055 | -1.550163 |
| C | -7.142297 | -0.664046 | 0.468332  |
| O | -7.855062 | -1.732447 | 1.067336  |
| C | -5.698720 | -0.480921 | 0.950400  |
| N | -0.959797 | 4.803265  | 0.632275  |
| C | -0.044381 | 3.764366  | 0.426000  |
| O | 1.169608  | 4.034220  | 0.448924  |
| N | -0.509508 | 2.513813  | 0.211093  |
| C | -1.821859 | 2.266189  | 0.193435  |
| N | -2.228348 | 1.010663  | -0.022100 |
| C | -2.777136 | 3.306104  | 0.399285  |
| C | -2.293618 | 4.551113  | 0.613811  |
| H | 0.970288  | 1.161042  | -0.019544 |
| H | 8.354472  | 0.426075  | -1.092737 |
| H | 3.426279  | -1.983694 | 0.072741  |
| H | 2.585966  | -4.657387 | 2.635314  |
| H | 2.844362  | -5.919873 | -0.142153 |
| H | 1.645451  | -6.282154 | 1.097568  |
| H | -4.985429 | -0.830076 | -1.841138 |
| H | -7.833136 | -0.350736 | -1.565349 |
| H | -7.668377 | 0.280980  | 0.636793  |

|   |           |           |           |
|---|-----------|-----------|-----------|
| H | -8.147411 | -1.447650 | 1.940249  |
| H | -5.206414 | -1.457905 | 1.003226  |
| H | -3.213782 | 0.768441  | -0.051304 |
| H | -3.836917 | 3.110805  | 0.385847  |
| H | -2.939122 | 5.400834  | 0.780031  |
| C | 0.076700  | -4.914241 | -0.415038 |
| H | -0.551891 | -4.054314 | -0.618246 |
| H | 0.228409  | -5.472158 | -1.342608 |
| H | -0.416979 | -5.561772 | 0.307481  |
| C | 6.458914  | -1.644538 | -1.150304 |
| H | 6.127469  | -2.220266 | -0.288700 |
| H | 5.864631  | -1.922448 | -2.019520 |
| H | 7.505329  | -1.859323 | -1.349258 |
| C | -0.446201 | 6.154099  | 0.864857  |
| H | 0.183017  | 6.167661  | 1.752348  |
| H | 0.143917  | 6.482444  | 0.011852  |
| H | -1.288970 | 6.824197  | 1.005337  |
| C | -5.816487 | 1.096907  | -2.275428 |
| H | -4.856373 | 1.599238  | -2.395884 |
| H | -6.166843 | 0.790929  | -3.262121 |
| H | -6.532631 | 1.805425  | -1.856419 |
| C | -6.146679 | -3.142640 | -1.059272 |
| H | -6.313653 | -4.045179 | -1.644286 |
| H | -5.109867 | -2.827657 | -1.197927 |
| H | -6.316228 | -3.361783 | -0.005015 |
| H | 1.480943  | -0.486837 | -0.351999 |
| H | -1.543046 | 0.288137  | -0.167142 |
| H | 2.500560  | 2.826916  | 0.099145  |
| H | 3.943085  | -5.597740 | 2.019154  |
| C | -5.542093 | 0.245964  | 2.266965  |
| H | -6.009972 | -0.334165 | 3.064175  |
| H | -4.489895 | 0.377442  | 2.519554  |
| H | -6.020128 | 1.225932  | 2.223275  |

69

1VS8\_gas\_quartet E = -2052.86495207 A.U.

|   |           |           |           |
|---|-----------|-----------|-----------|
| N | 0.304617  | -0.427001 | -1.216572 |
| C | -0.775596 | -1.265317 | -1.192268 |
| N | -1.997899 | -0.690330 | -1.214297 |
| N | -0.674384 | -2.580767 | -1.166061 |
| C | 0.604996  | -3.003133 | -1.173515 |
| C | 1.772566  | -2.248845 | -1.195289 |
| C | 1.660509  | -0.821249 | -1.219277 |
| O | 2.540106  | 0.029863  | -1.240478 |
| N | 2.882252  | -3.072325 | -1.195848 |
| C | 2.394365  | -4.281312 | -1.175259 |
| N | 1.014414  | -4.311277 | -1.161573 |
| N | 7.402859  | -1.367812 | -0.045148 |
| C | 6.269869  | -0.597353 | 0.021198  |
| N | 5.203630  | -1.053529 | -0.653352 |
| N | 6.187247  | 0.535995  | 0.698139  |
| C | 7.348685  | 0.839485  | 1.315658  |

|   |            |           |           |
|---|------------|-----------|-----------|
| C | 8.534305   | 0.136874  | 1.314892  |
| C | 8.609124   | -1.076322 | 0.582030  |
| O | 9.570087   | -1.843502 | 0.452401  |
| N | 9.494641   | 0.788502  | 2.076526  |
| C | 8.886694   | 1.856899  | 2.516655  |
| N | 7.584951   | 1.951313  | 2.089360  |
| N | -9.229357  | -1.596180 | 1.838602  |
| C | -8.635023  | -0.418152 | 2.248243  |
| O | -8.962797  | 0.169086  | 3.265214  |
| N | -7.640351  | 0.048032  | 1.423536  |
| C | -7.190872  | -0.532856 | 0.255768  |
| O | -6.270020  | -0.002581 | -0.366875 |
| C | -7.863002  | -1.743305 | -0.104891 |
| C | -8.835864  | -2.222014 | 0.678869  |
| N | -1.499104  | 4.367838  | -1.397605 |
| C | -1.634751  | 2.969404  | -1.233902 |
| O | -0.615346  | 2.287124  | -1.295589 |
| N | -2.872607  | 2.456738  | -1.021449 |
| C | -3.932249  | 3.250649  | -0.969935 |
| N | -5.136348  | 2.699133  | -0.744575 |
| C | -3.825868  | 4.668298  | -1.137502 |
| C | -2.586849  | 5.169804  | -1.347344 |
| H | -2.788276  | -1.299527 | -1.113992 |
| H | 2.971550   | -5.192037 | -1.170946 |
| H | 4.409265   | -0.462146 | -0.792120 |
| H | 9.354914   | 2.584617  | 3.146020  |
| H | -7.588507  | -2.263957 | -0.998465 |
| H | -9.327476  | -3.128045 | 0.391939  |
| H | -5.959783  | 3.271137  | -0.761669 |
| H | -4.687403  | 5.315433  | -1.095813 |
| H | -2.407624  | 6.227033  | -1.482891 |
| C | -10.286953 | -2.151019 | 2.695654  |
| H | -9.888723  | -2.353063 | 3.668020  |
| H | -11.086804 | -1.445009 | 2.777452  |
| H | -10.655151 | -3.058851 | 2.265336  |
| C | -0.154816  | 4.893677  | -1.625711 |
| H | 0.497093   | 4.623918  | -0.797838 |
| H | 0.265446   | 4.467384  | -2.534196 |
| H | -0.212943  | 5.975500  | -1.716110 |
| C | 0.153905   | -5.476065 | -1.131776 |
| H | -0.408265  | -5.517795 | -0.198980 |
| H | -0.552806  | -5.444934 | -1.959700 |
| H | 0.767915   | -6.369439 | -1.218704 |
| C | 6.627927   | 3.026527  | 2.387535  |
| H | 6.314486   | 3.488330  | 1.474630  |
| H | 5.776941   | 2.617178  | 2.890685  |
| H | 7.095738   | 3.756721  | 3.014332  |
| H | -2.136644  | 0.306418  | -1.116793 |
| H | 0.128459   | 0.578313  | -1.238695 |
| H | 5.016449   | -2.003433 | -0.903676 |
| H | -5.261212  | 1.698893  | -0.650612 |
| H | 7.213053   | -2.194377 | 0.484718  |
| H | -6.964480  | 0.615442  | 1.893906  |

69

1VS8\_cosmo\_quartet E = -2052.97515823 A.U.

|   |            |           |           |
|---|------------|-----------|-----------|
| N | 0.204030   | -0.638510 | -0.635847 |
| C | -0.910069  | -1.438801 | -0.674609 |
| N | -2.104814  | -0.823246 | -0.612687 |
| N | -0.851027  | -2.758170 | -0.748961 |
| C | 0.408825   | -3.227115 | -0.779458 |
| C | 1.600541   | -2.508058 | -0.744414 |
| C | 1.530917   | -1.087956 | -0.665812 |
| O | 2.458745   | -0.269752 | -0.624551 |
| N | 2.686001   | -3.364339 | -0.799478 |
| C | 2.156401   | -4.556747 | -0.864665 |
| N | 0.777829   | -4.542969 | -0.856460 |
| N | 7.368618   | -1.493418 | 0.182197  |
| C | 6.244732   | -0.728839 | -0.002137 |
| N | 5.185658   | -1.353269 | -0.539148 |
| N | 6.164061   | 0.552504  | 0.316015  |
| C | 7.317389   | 1.013631  | 0.844758  |
| C | 8.493526   | 0.332594  | 1.073382  |
| C | 8.566426   | -1.041301 | 0.724643  |
| O | 9.519565   | -1.819866 | 0.843673  |
| N | 9.447612   | 1.170066  | 1.634899  |
| C | 8.845412   | 2.324356  | 1.733647  |
| N | 7.553387   | 2.300144  | 1.268761  |
| N | -9.298031  | -1.050240 | 1.684793  |
| C | -8.696258  | 0.191744  | 1.749119  |
| O | -9.035641  | 1.050523  | 2.545259  |
| N | -7.680047  | 0.392247  | 0.846925  |
| C | -7.216046  | -0.504952 | -0.092689 |
| O | -6.276636  | -0.184099 | -0.821669 |
| C | -7.896939  | -1.763249 | -0.102469 |
| C | -8.890730  | -1.987742 | 0.764647  |
| N | -1.181484  | 4.148213  | -1.081199 |
| C | -1.323301  | 2.775727  | -0.829331 |
| O | -0.302529  | 2.131231  | -0.544305 |
| N | -2.553226  | 2.215797  | -0.905598 |
| C | -3.617518  | 2.960506  | -1.212049 |
| N | -4.820385  | 2.378838  | -1.272755 |
| C | -3.499924  | 4.359294  | -1.477901 |
| C | -2.264884  | 4.901661  | -1.398951 |
| H | -2.923046  | -1.400095 | -0.727392 |
| H | 2.702296   | -5.486923 | -0.920813 |
| H | 4.282801   | -0.881575 | -0.561600 |
| H | 9.311034   | 3.199817  | 2.135739  |
| H | -7.612305  | -2.522196 | -0.800954 |
| H | -9.388596  | -2.934580 | 0.741325  |
| H | -5.633398  | 2.933199  | -1.491997 |
| H | -4.360064  | 4.961809  | -1.728114 |
| H | -2.081068  | 5.952275  | -1.581734 |
| C | -10.378921 | -1.325790 | 2.642198  |
| H | -10.001964 | -1.240476 | 3.639965  |

|   |            |           |           |
|---|------------|-----------|-----------|
| H | -11.170893 | -0.620749 | 2.498636  |
| H | -10.750697 | -2.316724 | 2.484901  |
| C | 0.155813   | 4.732818  | -0.995990 |
| H | 0.560702   | 4.600839  | 0.005290  |
| H | 0.823801   | 4.245944  | -1.703404 |
| H | 0.086101   | 5.792272  | -1.226478 |
| C | -0.114283  | -5.687633 | -0.917505 |
| H | -0.744501  | -5.725898 | -0.030258 |
| H | -0.751310  | -5.626629 | -1.798631 |
| H | 0.484198   | -6.593416 | -0.970743 |
| C | 6.605004   | 3.422303  | 1.221998  |
| H | 6.315068   | 3.602243  | 0.207862  |
| H | 5.739302   | 3.182113  | 1.803190  |
| H | 7.070292   | 4.299397  | 1.620907  |
| H | -2.212488  | 0.186661  | -0.685858 |
| H | 0.060407   | 0.379859  | -0.584064 |
| H | 5.152271   | -2.358329 | -0.611177 |
| H | -4.976393  | 1.403988  | -1.049696 |
| H | 7.350010   | -2.471626 | -0.094526 |
| H | -7.223542  | 1.300271  | 0.893696  |

69

3OAS\_gas\_quartet E = -2052.91098315 A.U.

|   |            |           |           |
|---|------------|-----------|-----------|
| N | 0.671828   | 2.208473  | 0.712599  |
| C | 0.159877   | 3.422369  | 0.344794  |
| N | -1.167463  | 3.583975  | 0.528355  |
| N | 0.888527   | 4.389746  | -0.175359 |
| C | 2.184687   | 4.046151  | -0.302725 |
| C | 2.808793   | 2.847782  | 0.031400  |
| C | 2.011961   | 1.799368  | 0.593069  |
| O | 2.337218   | 0.673583  | 0.959293  |
| N | 4.159172   | 2.912909  | -0.254573 |
| C | 4.337164   | 4.108092  | -0.746261 |
| N | 3.176183   | 4.848468  | -0.803843 |
| N | 7.284178   | -0.137250 | -0.608365 |
| C | 6.110228   | -0.720340 | -0.205623 |
| N | 5.164961   | 0.093052  | 0.274432  |
| N | 5.870530   | -2.015194 | -0.267196 |
| C | 6.920981   | -2.691205 | -0.773041 |
| C | 8.135862   | -2.207619 | -1.206697 |
| C | 8.377737   | -0.815642 | -1.131839 |
| O | 9.389705   | -0.190381 | -1.464047 |
| N | 8.943740   | -3.234088 | -1.656427 |
| C | 8.218336   | -4.299260 | -1.496709 |
| N | 6.976067   | -4.043270 | -0.981681 |
| N | -10.472010 | -0.419279 | -2.144844 |
| C | -9.598237  | -1.484400 | -2.295283 |
| O | -9.681360  | -2.272551 | -3.220719 |
| N | -8.601902  | -1.581654 | -1.346621 |
| C | -8.402128  | -0.757118 | -0.262231 |
| O | -7.463472  | -0.967177 | 0.504502  |
| C | -9.359334  | 0.296903  | -0.153043 |

|   |            |           |           |
|---|------------|-----------|-----------|
| C | -10.342890 | 0.421419  | -1.058041 |
| N | -1.282183  | -0.967781 | 2.978465  |
| C | -2.081851  | -0.038431 | 2.275285  |
| O | -1.554984  | 1.030610  | 1.936069  |
| N | -3.365290  | -0.350093 | 2.013029  |
| C | -3.869865  | -1.513783 | 2.398285  |
| N | -5.154751  | -1.770532 | 2.108114  |
| C | -3.091891  | -2.481448 | 3.107556  |
| C | -1.806012  | -2.152733 | 3.369646  |
| H | -1.554422  | 4.492006  | 0.354290  |
| H | 5.276228   | 4.514033  | -1.086087 |
| H | 5.160006   | 1.091345  | 0.100531  |
| H | 8.559027   | -5.282963 | -1.744012 |
| H | -9.292035  | 0.993072  | 0.656724  |
| H | -11.058213 | 1.206998  | -0.931223 |
| H | -5.708685  | -1.132113 | 1.556492  |
| H | -3.498952  | -3.429226 | 3.422655  |
| H | -1.137282  | -2.815979 | 3.899244  |
| C | 5.944979   | -5.040613 | -0.660673 |
| H | 5.743839   | -5.020176 | 0.390055  |
| H | 5.049042   | -4.813590 | -1.199804 |
| H | 6.291525   | -6.014042 | -0.938607 |
| C | 3.013985   | 6.205062  | -1.289383 |
| H | 2.275894   | 6.234547  | -2.089322 |
| H | 2.681568   | 6.862446  | -0.486884 |
| H | 3.969346   | 6.558314  | -1.669745 |
| C | 0.108411   | -0.615989 | 3.273556  |
| H | 0.690473   | -0.499953 | 2.360923  |
| H | 0.141997   | 0.323254  | 3.821756  |
| H | 0.543823   | -1.405546 | 3.880899  |
| C | -11.591675 | -0.302065 | -3.090098 |
| H | -11.209791 | -0.197479 | -4.084145 |
| H | -12.200521 | -1.180067 | -3.032457 |
| H | -12.179715 | 0.556673  | -2.841738 |
| H | -7.955505  | -2.346029 | -1.479902 |
| H | -5.562517  | -2.657695 | 2.335041  |
| H | 4.256506   | -0.288817 | 0.484133  |
| H | 7.404020   | 0.859720  | -0.513671 |
| H | 0.025807   | 1.543862  | 1.142709  |
| H | -1.704137  | 2.873351  | 1.007091  |

69

3OAS\_cosmo\_quartet E = -2052.97626118 A.U.

|   |           |          |           |
|---|-----------|----------|-----------|
| N | 0.836022  | 1.848759 | 1.027304  |
| C | 0.106695  | 3.007600 | 0.954249  |
| N | -1.142604 | 2.966393 | 1.461447  |
| N | 0.582264  | 4.131904 | 0.448096  |
| C | 1.850065  | 4.017311 | 0.014277  |
| C | 2.671263  | 2.893088 | 0.027313  |
| C | 2.151257  | 1.683221 | 0.575500  |
| O | 2.701383  | 0.581346 | 0.690699  |
| N | 3.906269  | 3.192853 | -0.522018 |



|   |            |           |           |
|---|------------|-----------|-----------|
| C | 3.821738   | 4.454529  | -0.850656 |
| N | 2.599494   | 5.013757  | -0.550993 |
| N | 7.457254   | -0.000421 | -1.259233 |
| C | 6.302242   | -0.410224 | -0.644139 |
| N | 5.362977   | 0.518427  | -0.441779 |
| N | 6.074835   | -1.647854 | -0.251090 |
| C | 7.116975   | -2.456285 | -0.528034 |
| C | 8.313058   | -2.150544 | -1.139396 |
| C | 8.541977   | -0.817131 | -1.553295 |
| O | 9.536745   | -0.343527 | -2.111447 |
| N | 9.118209   | -3.269008 | -1.235982 |
| C | 8.409473   | -4.215011 | -0.698318 |
| N | 7.180439   | -3.798036 | -0.262857 |
| N | -10.332801 | -0.790633 | -2.041510 |
| C | -9.452434  | -1.842908 | -1.845906 |
| O | -9.554614  | -2.900347 | -2.442488 |
| N | -8.427213  | -1.609397 | -0.953439 |
| C | -8.204068  | -0.463390 | -0.223775 |
| O | -7.240753  | -0.398144 | 0.538358  |
| C | -9.168959  | 0.564379  | -0.451642 |
| C | -10.180399 | 0.371440  | -1.312849 |
| N | -1.968005  | -1.938389 | 2.504130  |
| C | -1.568140  | -0.632125 | 2.189470  |
| O | -0.375491  | -0.330065 | 2.354049  |
| N | -2.489317  | 0.240735  | 1.723151  |
| C | -3.756869  | -0.138026 | 1.544008  |
| N | -4.632113  | 0.756960  | 1.076407  |
| C | -4.189856  | -1.465482 | 1.846238  |
| C | -3.259176  | -2.320945 | 2.324211  |
| H | -1.715585  | 3.778744  | 1.290633  |
| H | 4.604074   | 5.039360  | -1.311240 |
| H | 5.457762   | 1.481626  | -0.728196 |
| H | 8.753257   | -5.223938 | -0.604615 |
| H | -9.085054  | 1.495771  | 0.068311  |
| H | -10.900072 | 1.152986  | -1.439976 |
| H | -4.313672  | 1.683926  | 0.838353  |
| H | -5.213819  | -1.769330 | 1.698586  |
| H | -3.493846  | -3.345016 | 2.583494  |
| C | 6.170254   | -4.625051 | 0.412752  |
| H | 6.000371   | -4.245965 | 1.398825  |
| H | 5.256212   | -4.596363 | -0.142774 |
| H | 6.518864   | -5.634820 | 0.473988  |
| C | 2.175946   | 6.382800  | -0.789394 |
| H | 1.339977   | 6.407365  | -1.487019 |
| H | 1.868781   | 6.851155  | 0.144188  |
| H | 3.010469   | 6.937337  | -1.210690 |
| C | -0.960281  | -2.867562 | 3.012358  |
| H | -0.164042  | -2.995203 | 2.281762  |
| H | -0.524057  | -2.482449 | 3.931702  |
| H | -1.437258  | -3.824378 | 3.205944  |
| C | -11.481394 | -1.004192 | -2.933709 |
| H | -11.130521 | -1.246417 | -3.915095 |
| H | -12.078709 | -1.809315 | -2.559675 |

|   |            |           |           |
|---|------------|-----------|-----------|
| H | -12.071019 | -0.112296 | -2.975782 |
| H | -7.775942  | -2.381654 | -0.830091 |
| H | -5.593401  | 0.495515  | 0.890727  |
| H | 4.478465   | 0.286645  | 0.000028  |
| H | 7.550222   | 0.975084  | -1.529793 |
| H | 0.402581   | 1.030263  | 1.482384  |
| H | -1.618372  | 2.071961  | 1.585652  |

69

2AW4\_gas\_quartet E = -2052.79762580 A.U.

|   |           |           |           |
|---|-----------|-----------|-----------|
| N | 0.891718  | 2.188395  | 1.040276  |
| C | 0.388078  | 3.455903  | 0.956897  |
| N | -0.752786 | 3.699824  | 1.650610  |
| N | 0.958392  | 4.426263  | 0.271806  |
| C | 2.095607  | 4.031767  | -0.334865 |
| C | 2.679834  | 2.771495  | -0.348515 |
| C | 2.048099  | 1.714802  | 0.385032  |
| O | 2.376746  | 0.541181  | 0.498297  |
| N | 3.834627  | 2.783071  | -1.105037 |
| C | 3.941118  | 4.011914  | -1.529111 |
| N | 2.913554  | 4.824355  | -1.097571 |
| N | 6.958444  | -0.583163 | -1.649959 |
| C | 5.813865  | -0.953591 | -0.988394 |
| N | 4.774551  | -0.112144 | -1.086010 |
| N | 5.697104  | -2.065380 | -0.282770 |
| C | 6.835721  | -2.791609 | -0.293688 |
| C | 8.029439  | -2.512054 | -0.924997 |
| C | 8.142099  | -1.312886 | -1.675456 |
| O | 9.117510  | -0.883316 | -2.302934 |
| N | 8.956827  | -3.517459 | -0.691452 |
| C | 8.323977  | -4.372850 | 0.065168  |
| N | 7.034252  | -3.989412 | 0.348998  |
| N | -9.839093 | -1.618243 | -2.248541 |
| C | -9.286717 | -2.379967 | -1.237695 |
| O | -9.600066 | -3.540298 | -1.036747 |
| N | -8.352850 | -1.729479 | -0.471241 |
| C | -7.925560 | -0.424459 | -0.611858 |
| O | -7.051593 | 0.009882  | 0.139666  |
| C | -8.551580 | 0.296463  | -1.675526 |
| C | -9.462843 | -0.309925 | -2.438785 |
| N | -2.168962 | -1.003365 | 3.015994  |
| C | -1.741048 | 0.285871  | 2.636027  |
| O | -0.587971 | 0.617184  | 2.909706  |
| N | -2.616118 | 1.093743  | 1.984774  |
| C | -3.835933 | 0.666077  | 1.687679  |
| N | -4.659029 | 1.501293  | 1.030310  |
| C | -4.296836 | -0.637112 | 2.052830  |
| C | -3.420778 | -1.426007 | 2.716000  |
| H | -1.362056 | 2.926738  | 1.893287  |
| H | 4.733875  | 4.395066  | -2.151118 |
| H | 3.971859  | -0.239287 | -0.503303 |
| H | 8.763535  | -5.278792 | 0.427072  |

|   |            |           |           |
|---|------------|-----------|-----------|
| H | -8.290712  | 1.317837  | -1.858910 |
| H | -9.919431  | 0.245101  | -3.231498 |
| H | -5.553425  | 1.181493  | 0.688934  |
| H | -5.291045  | -0.970962 | 1.804902  |
| H | -3.673726  | -2.427496 | 3.033905  |
| C | 6.056912   | -4.703246 | 1.183314  |
| H | 5.771496   | -4.083566 | 2.007601  |
| H | 5.192658   | -4.938573 | 0.597995  |
| H | 6.495148   | -5.607225 | 1.551674  |
| C | -1.203574  | -1.857771 | 3.703979  |
| H | -0.319473  | -1.994013 | 3.084858  |
| H | -0.891550  | -1.394094 | 4.637517  |
| H | -1.669129  | -2.819201 | 3.905988  |
| C | 2.723625   | 6.234324  | -1.373294 |
| H | 1.777793   | 6.398867  | -1.888042 |
| H | 2.717357   | 6.806908  | -0.446716 |
| H | 3.539073   | 6.582017  | -2.003011 |
| C | -10.839745 | -2.251817 | -3.119249 |
| H | -10.402208 | -3.096029 | -3.609941 |
| H | -11.672616 | -2.574023 | -2.529825 |
| H | -11.172799 | -1.546588 | -3.851808 |
| H | 4.846315   | 0.869695  | -1.261664 |
| H | -4.290171  | 2.382520  | 0.720687  |
| H | -1.174665  | 4.593985  | 1.473915  |
| H | 0.421487   | 1.525977  | 1.666198  |
| H | -7.816285  | -2.181801 | -1.183627 |
| H | 6.734716   | -0.531628 | -2.623234 |

69

2AW4\_cosmo\_quartet E = -2052.97883623 A.U.

|   |           |           |           |
|---|-----------|-----------|-----------|
| N | 0.758967  | 2.067917  | 1.116250  |
| C | 0.137639  | 3.278055  | 0.946752  |
| N | -1.069245 | 3.418489  | 1.537371  |
| N | 0.674059  | 4.280667  | 0.274894  |
| C | 1.885589  | 3.984498  | -0.229540 |
| C | 2.589293  | 2.786810  | -0.143497 |
| C | 2.004224  | 1.707122  | 0.584794  |
| O | 2.449136  | 0.572326  | 0.786297  |
| N | 3.795636  | 2.890428  | -0.814394 |
| C | 3.809216  | 4.110180  | -1.283577 |
| N | 2.678678  | 4.826057  | -0.963062 |
| N | 7.023150  | -0.267592 | -1.443308 |
| C | 5.877775  | -0.760003 | -0.868376 |
| N | 4.829592  | 0.075053  | -0.826666 |
| N | 5.768317  | -1.979703 | -0.370353 |
| C | 6.915303  | -2.681266 | -0.497650 |
| C | 8.110624  | -2.283119 | -1.058318 |
| C | 8.215290  | -0.969586 | -1.585153 |
| O | 9.190597  | -0.426623 | -2.117800 |
| N | 9.047707  | -3.304615 | -0.996115 |
| C | 8.418855  | -4.286033 | -0.407852 |
| N | 7.112888  | -3.975006 | -0.074946 |

|   |            |           |           |
|---|------------|-----------|-----------|
| N | -9.756121  | -1.349016 | -2.378326 |
| C | -9.202861  | -2.271141 | -1.511783 |
| O | -9.504412  | -3.451765 | -1.521037 |
| N | -8.282680  | -1.756202 | -0.633884 |
| C | -7.869325  | -0.442711 | -0.538767 |
| O | -7.006448  | -0.138556 | 0.286001  |
| C | -8.495343  | 0.447824  | -1.465131 |
| C | -9.393512  | -0.023939 | -2.331962 |
| N | -2.150742  | -1.273006 | 3.134312  |
| C | -1.672244  | -0.044998 | 2.658499  |
| O | -0.492871  | 0.259763  | 2.899060  |
| N | -2.505127  | 0.755977  | 1.956752  |
| C | -3.752557  | 0.368329  | 1.682866  |
| N | -4.533505  | 1.186309  | 0.970641  |
| C | -4.262135  | -0.885507 | 2.140583  |
| C | -3.424435  | -1.661599 | 2.863460  |
| H | 4.602899   | 4.551813  | -1.867593 |
| H | 4.032046   | -0.151627 | -0.245133 |
| H | 8.832923   | -5.257876 | -0.183048 |
| H | -8.224780  | 1.491896  | -1.450248 |
| H | -9.887100  | 0.613065  | -3.054207 |
| H | -5.460209  | 0.894332  | 0.681219  |
| H | -5.270503  | -1.194773 | 1.917828  |
| H | -3.722684  | -2.624848 | 3.256130  |
| C | 6.147053   | -4.830580 | 0.612637  |
| H | 5.905921   | -4.422232 | 1.593085  |
| H | 5.233090   | -4.909007 | 0.027039  |
| H | 6.584426   | -5.818365 | 0.731570  |
| C | -1.239905  | -2.121881 | 3.900448  |
| H | -0.372276  | -2.382572 | 3.297645  |
| H | -0.895447  | -1.596732 | 4.788908  |
| H | -1.769425  | -3.024949 | 4.191228  |
| C | 2.376544   | 6.200461  | -1.324319 |
| H | 1.450473   | 6.246572  | -1.894987 |
| H | 2.270335   | 6.814108  | -0.430986 |
| H | 3.191011   | 6.588291  | -1.930586 |
| C | -10.742516 | -1.829540 | -3.356600 |
| H | -10.295638 | -2.588464 | -3.995119 |
| H | -11.598522 | -2.262791 | -2.843597 |
| H | -11.064190 | -0.985885 | -3.959075 |
| H | 4.909905   | 1.065582  | -1.027475 |
| H | -4.149790  | 2.049687  | 0.617392  |
| H | 0.302171   | 1.369526  | 1.723248  |
| H | -7.859384  | -2.425975 | 0.004752  |
| H | 7.025364   | 0.685280  | -1.797540 |
| H | -1.615302  | 2.581580  | 1.744262  |
| H | -1.579763  | 4.254637  | 1.295867  |

38

1EVV\_carbonyl\_gas E = -1092.95948598 A.U.

|   |           |           |           |
|---|-----------|-----------|-----------|
| C | -5.526309 | -1.849137 | 0.108459  |
| N | -4.763884 | -0.644237 | -0.156075 |

|   |           |           |           |
|---|-----------|-----------|-----------|
| C | -5.224634 | 0.558239  | -0.667362 |
| N | -4.291955 | 1.459758  | -0.786678 |
| C | -3.147882 | 0.837571  | -0.333828 |
| C | -1.804984 | 1.322345  | -0.211249 |
| O | -1.347302 | 2.421455  | -0.489695 |
| N | -0.960442 | 0.311118  | 0.326141  |
| C | -1.343608 | -0.959753 | 0.664047  |
| N | -0.378665 | -1.771664 | 1.176790  |
| N | -2.575432 | -1.403140 | 0.545241  |
| C | -3.423338 | -0.469290 | 0.061808  |
| C | 4.193968  | 2.134131  | 0.394102  |
| N | 4.001588  | 0.709501  | 0.088356  |
| C | 2.762465  | 0.117068  | 0.424682  |
| O | 1.901097  | 0.805634  | 0.971307  |
| N | 2.575319  | -1.197983 | 0.129193  |
| C | 3.521175  | -1.897915 | -0.475131 |
| N | 3.264975  | -3.199969 | -0.738753 |
| C | 4.779674  | -1.329392 | -0.830465 |
| C | 4.961476  | -0.019899 | -0.523919 |
| O | 1.284768  | 3.534825  | 0.024663  |
| H | -0.662325 | -2.726587 | 1.317130  |
| H | 0.597913  | -1.594381 | 0.962399  |
| H | 0.006009  | 0.583090  | 0.514717  |
| H | -6.263883 | 0.690250  | -0.927895 |
| H | -5.132585 | -2.686074 | -0.469347 |
| H | -5.483245 | -2.105685 | 1.167580  |
| H | -6.563000 | -1.675456 | -0.175188 |
| H | 3.896333  | -3.753626 | -1.289389 |
| H | 2.337556  | -3.552003 | -0.570536 |
| H | 5.879763  | 0.502086  | -0.756953 |
| H | 5.554320  | -1.900341 | -1.319543 |
| H | 3.479463  | 2.741849  | -0.160874 |
| H | 4.038979  | 2.301944  | 1.458678  |
| H | 5.211770  | 2.408541  | 0.124840  |
| H | 0.377510  | 3.385618  | -0.290059 |
| H | 1.428357  | 2.777983  | 0.607861  |

38

1EVV\_carbonyl\_cosmo E = -1093.00373618 A.U.

|   |           |           |           |
|---|-----------|-----------|-----------|
| C | -5.490991 | -2.001671 | 0.296083  |
| N | -4.786662 | -0.757807 | 0.020604  |
| C | -5.338461 | 0.451404  | -0.349248 |
| N | -4.449729 | 1.393384  | -0.531094 |
| C | -3.239389 | 0.778579  | -0.269502 |
| C | -1.910792 | 1.289032  | -0.292715 |
| O | -1.540706 | 2.439312  | -0.564556 |
| N | -0.972477 | 0.300734  | 0.049488  |
| C | -1.271306 | -1.003497 | 0.368614  |
| N | -0.232439 | -1.799416 | 0.703861  |
| N | -2.503452 | -1.478138 | 0.391566  |
| C | -3.433803 | -0.557863 | 0.075253  |
| C | 4.263857  | 2.208796  | 0.325452  |

|   |           |           |           |
|---|-----------|-----------|-----------|
| N | 4.085166  | 0.770727  | 0.103443  |
| C | 2.787200  | 0.246702  | 0.103107  |
| O | 1.829108  | 1.020003  | 0.296169  |
| N | 2.612461  | -1.077370 | -0.102851 |
| C | 3.659630  | -1.876569 | -0.314727 |
| N | 3.425290  | -3.180383 | -0.523756 |
| C | 4.994078  | -1.374203 | -0.320978 |
| C | 5.150593  | -0.046607 | -0.106963 |
| O | 0.830237  | 3.696497  | 0.325102  |
| H | -0.447138 | -2.778023 | 0.809609  |
| H | 0.723610  | -1.559666 | 0.432248  |
| H | 0.014611  | 0.588666  | 0.089311  |
| H | -6.405490 | 0.562719  | -0.464470 |
| H | -5.178338 | -2.776739 | -0.402953 |
| H | -5.287279 | -2.333365 | 1.313564  |
| H | -6.558400 | -1.828086 | 0.183482  |
| H | 4.177149  | -3.826746 | -0.692280 |
| H | 2.481077  | -3.529506 | -0.536918 |
| H | 6.122398  | 0.425593  | -0.093761 |
| H | 5.844819  | -2.016125 | -0.489750 |
| H | 3.754385  | 2.773823  | -0.453250 |
| H | 3.857234  | 2.490059  | 1.295386  |
| H | 5.326447  | 2.433420  | 0.298987  |
| H | -0.017388 | 3.346219  | -0.007696 |
| H | 1.372374  | 2.894538  | 0.399680  |

38

1YIJ\_amino\_gas E = -1092.95995000 A.U.

|   |           |           |           |
|---|-----------|-----------|-----------|
| C | 4.035299  | -2.871101 | 0.538071  |
| N | 4.006304  | -1.429567 | 0.289409  |
| C | 2.745215  | -0.785482 | 0.316241  |
| O | 1.746814  | -1.462703 | 0.554686  |
| N | 2.698358  | 0.549387  | 0.080629  |
| C | 3.796687  | 1.236353  | -0.209926 |
| N | 3.667511  | 2.545914  | -0.478148 |
| C | 5.086620  | 0.611424  | -0.230828 |
| C | 5.129773  | -0.718564 | 0.023670  |
| C | -5.456129 | 1.567161  | 0.810134  |
| N | -0.990903 | -0.628138 | -0.101049 |
| C | -1.275482 | 0.586599  | 0.446158  |
| N | -0.202216 | 1.394831  | 0.782482  |
| N | -2.487922 | 1.050327  | 0.620196  |
| C | -3.441790 | 0.192412  | 0.187579  |
| C | -3.283352 | -1.049987 | -0.416889 |
| C | -1.952829 | -1.567175 | -0.601418 |
| O | -1.580258 | -2.619627 | -1.078609 |
| N | -4.509236 | -1.598198 | -0.725100 |
| C | -5.377011 | -0.713498 | -0.319170 |
| N | -4.793649 | 0.406493  | 0.246290  |
| O | 0.952969  | 3.519090  | -0.841839 |
| H | 3.620932  | -3.088711 | 1.521341  |
| H | 4.470403  | 3.086266  | -0.747634 |

|   |           |           |           |
|---|-----------|-----------|-----------|
| H | 5.987616  | 1.164651  | -0.449901 |
| H | 6.057434  | -1.275734 | 0.021526  |
| H | -5.324804 | 1.602994  | 1.892834  |
| H | -0.399307 | 2.000283  | 1.566725  |
| H | -6.449884 | -0.802697 | -0.398750 |
| H | 0.412065  | 2.813567  | -0.429585 |
| H | 0.540785  | 3.705997  | -1.691112 |
| H | -6.519030 | 1.509346  | 0.581354  |
| H | -5.045711 | 2.480105  | 0.379060  |
| H | 5.066787  | -3.214167 | 0.486268  |
| H | 3.432748  | -3.390700 | -0.205626 |
| H | -0.028121 | -0.976084 | -0.049852 |
| H | 0.726266  | 0.973548  | 0.783912  |
| H | 2.735886  | 2.951045  | -0.599169 |

38

1YIJ\_amino\_cosmo E = -1092.99908611 A.U.

|   |           |           |           |
|---|-----------|-----------|-----------|
| C | -3.983278 | -2.927819 | -0.491800 |
| N | -3.942867 | -1.473709 | -0.318239 |
| C | -2.699262 | -0.860838 | -0.103012 |
| O | -1.682748 | -1.574424 | -0.064302 |
| N | -2.649302 | 0.482089  | 0.052398  |
| C | -3.764836 | 1.217117  | 0.039829  |
| N | -3.650184 | 2.537439  | 0.238804  |
| C | -5.042937 | 0.620253  | -0.186477 |
| C | -5.075064 | -0.722618 | -0.358004 |
| C | 5.419078  | 1.564728  | -0.963404 |
| N | 0.974530  | -0.573592 | 0.238036  |
| C | 1.233167  | 0.652667  | -0.313482 |
| N | 0.156394  | 1.461763  | -0.552924 |
| N | 2.444603  | 1.094657  | -0.574884 |
| C | 3.412827  | 0.219666  | -0.231906 |
| C | 3.268139  | -1.032085 | 0.359913  |
| C | 1.950914  | -1.517299 | 0.626517  |
| O | 1.610134  | -2.596406 | 1.111076  |
| N | 4.503166  | -1.616787 | 0.563504  |
| C | 5.359109  | -0.737658 | 0.107631  |
| N | 4.760589  | 0.399760  | -0.389903 |
| O | -1.033956 | 3.587395  | 1.156671  |
| H | -3.380111 | -3.218661 | -1.350190 |
| H | -4.473563 | 3.114108  | 0.282069  |
| H | -5.949644 | 1.205222  | -0.210451 |
| H | -5.997215 | -1.260129 | -0.528834 |
| H | 5.084655  | 1.720891  | -1.988343 |
| H | 0.297708  | 2.140246  | -1.287451 |
| H | 6.432310  | -0.849092 | 0.101343  |
| H | -0.432714 | 2.909706  | 0.797250  |
| H | -0.906714 | 3.564754  | 2.112386  |
| H | 6.492574  | 1.392701  | -0.960016 |
| H | 5.196528  | 2.453719  | -0.374086 |
| H | -5.014866 | -3.229386 | -0.652000 |
| H | -3.591983 | -3.421726 | 0.396055  |

|   |           |           |           |
|---|-----------|-----------|-----------|
| H | -0.004138 | -0.901778 | 0.269129  |
| H | -0.787204 | 1.070632  | -0.477772 |
| H | -2.758715 | 2.938265  | 0.530980  |

41

1EHZ\_gas E = -1169.43796937 A.U.

|   |           |           |           |
|---|-----------|-----------|-----------|
| C | -5.599384 | 1.603282  | 0.681723  |
| N | -4.859045 | 0.459887  | 0.181141  |
| C | -5.365744 | -0.706438 | -0.365431 |
| N | -4.442727 | -1.560983 | -0.707479 |
| C | -3.257691 | -0.942895 | -0.374450 |
| C | -1.901705 | -1.399696 | -0.482594 |
| O | -1.468753 | -2.460517 | -0.901018 |
| N | -1.004985 | -0.404667 | 0.011100  |
| C | -1.364590 | 0.815411  | 0.504661  |
| N | -0.338836 | 1.677796  | 0.848206  |
| N | -2.602292 | 1.226052  | 0.617092  |
| C | -3.498277 | 0.311091  | 0.179984  |
| H | -0.582048 | 2.300947  | 1.605092  |
| H | 0.606579  | 1.297242  | 0.883948  |
| H | -0.027942 | -0.696441 | 0.112172  |
| H | -6.429220 | -0.850785 | -0.481310 |
| H | -5.207111 | 2.522472  | 0.247562  |
| H | -6.645497 | 1.492588  | 0.401467  |
| H | -5.525069 | 1.670027  | 1.768270  |
| C | 4.056615  | -2.511503 | 0.632772  |
| N | 3.960519  | -1.074764 | 0.345047  |
| C | 2.697839  | -0.455119 | 0.438201  |
| O | 1.725094  | -1.133699 | 0.790628  |
| N | 2.593372  | 0.861788  | 0.145148  |
| C | 3.650277  | 1.561562  | -0.257542 |
| N | 3.467221  | 2.851753  | -0.579358 |
| C | 4.949190  | 0.966166  | -0.339838 |
| C | 5.042501  | -0.350229 | -0.033014 |
| H | 3.665688  | -2.713198 | 1.628590  |
| H | 3.476621  | -3.084293 | -0.090343 |
| H | 5.103996  | -2.802205 | 0.584765  |
| H | 5.818446  | 1.527892  | -0.647602 |
| H | 5.980118  | -0.887622 | -0.080726 |
| H | 4.235238  | 3.392794  | -0.935737 |
| H | 2.520426  | 3.229277  | -0.665039 |
| O | 1.152576  | -3.732099 | -0.406305 |
| H | 0.209377  | 3.072078  | -0.426008 |
| H | 0.291614  | 3.924309  | -1.719697 |
| O | 0.728446  | 3.769692  | -0.876231 |
| H | 0.266159  | -3.570276 | -0.763983 |
| H | 1.276937  | -2.979651 | 0.188875  |

41

1EHZ\_2HOH\_cosmo E = -1169.47941069 A.U.

|   |           |           |           |
|---|-----------|-----------|-----------|
| C | -5.480109 | -1.757639 | -0.943608 |
| N | -4.814481 | -0.579702 | -0.405070 |



|   |           |           |           |
|---|-----------|-----------|-----------|
| C | -5.406294 | 0.575701  | 0.059410  |
| N | -4.546405 | 1.463852  | 0.488012  |
| C | -3.314868 | 0.866539  | 0.300850  |
| C | -1.998341 | 1.350936  | 0.546223  |
| O | -1.663110 | 2.451769  | 0.999323  |
| N | -1.024535 | 0.398468  | 0.189416  |
| C | -1.288695 | -0.847345 | -0.321468 |
| N | -0.218247 | -1.668794 | -0.529344 |
| N | -2.502432 | -1.289281 | -0.569697 |
| C | -3.466664 | -0.402366 | -0.253573 |
| H | -0.363419 | -2.382092 | -1.229175 |
| H | 0.731193  | -1.291750 | -0.457652 |
| H | -0.043583 | 0.709661  | 0.222902  |
| H | -6.478945 | 0.692096  | 0.051060  |
| H | -5.147595 | -1.944902 | -1.963867 |
| H | -5.261247 | -2.629819 | -0.328493 |
| H | -6.552547 | -1.579524 | -0.943955 |
| C | 4.073259  | 2.576587  | -0.639825 |
| N | 3.972310  | 1.132636  | -0.409589 |
| C | 2.712812  | 0.575052  | -0.164821 |
| O | 1.714720  | 1.324139  | -0.155186 |
| N | 2.609535  | -0.753051 | 0.047620  |
| C | 3.696812  | -1.531813 | 0.064789  |
| N | 3.532781  | -2.835078 | 0.322172  |
| C | 4.994867  | -0.993490 | -0.190060 |
| C | 5.076670  | 0.337987  | -0.418808 |
| H | 3.430208  | 2.866258  | -1.468620 |
| H | 3.772342  | 3.122618  | 0.253314  |
| H | 5.105065  | 2.817702  | -0.879793 |
| H | 5.878820  | -1.612707 | -0.191220 |
| H | 6.016873  | 0.833769  | -0.614124 |
| H | 4.334135  | -3.440326 | 0.386498  |
| H | 2.628477  | -3.189879 | 0.634985  |
| O | 0.691638  | 3.915767  | 0.404129  |
| H | 0.314249  | -3.076186 | 0.905704  |
| H | 0.777971  | -3.666630 | 2.253963  |
| O | 0.897135  | -3.749335 | 1.300446  |
| H | -0.151614 | 3.500199  | 0.661006  |
| H | 1.230167  | 3.148552  | 0.148479  |

48

1FFK\_gas E = -1738.98098413 A.U.

|   |           |           |           |
|---|-----------|-----------|-----------|
| O | 3.296120  | -2.907371 | 1.295305  |
| P | 3.208820  | -2.377722 | -0.264424 |
| O | 4.608587  | -1.514167 | -0.274082 |
| O | 2.116547  | -1.339801 | -0.371027 |
| O | 3.278372  | -3.543056 | -1.193903 |
| N | 0.959383  | 4.677260  | 0.125980  |
| C | 0.292075  | 3.429311  | -0.024975 |
| O | -0.935590 | 3.442666  | -0.082826 |
| N | 1.043808  | 2.312035  | -0.095328 |
| C | 2.373528  | 2.348881  | -0.025119 |

|   |           |           |           |
|---|-----------|-----------|-----------|
| N | 3.046787  | 1.207871  | -0.101306 |
| C | 3.066355  | 3.602781  | 0.129263  |
| C | 2.313341  | 4.721696  | 0.198261  |
| N | -2.628874 | 0.875329  | -0.107949 |
| C | -1.905624 | -0.286195 | -0.268821 |
| N | -0.585186 | -0.166275 | -0.438426 |
| N | -2.474670 | -1.483559 | -0.273529 |
| C | -3.805339 | -1.433779 | -0.112371 |
| C | -4.634597 | -0.329410 | 0.057418  |
| C | -4.034436 | 0.976105  | 0.069434  |
| O | -4.558493 | 2.069471  | 0.204256  |
| N | -5.952145 | -0.725552 | 0.189625  |
| C | -5.916237 | -2.025321 | 0.102040  |
| N | -4.639935 | -2.525659 | -0.082593 |
| H | 2.591414  | 0.274911  | -0.203473 |
| H | 4.142385  | 3.651917  | 0.188077  |
| H | 2.750816  | 5.704181  | 0.314736  |
| H | 0.008826  | -0.984042 | -0.475961 |
| H | -6.769680 | -2.682884 | 0.161743  |
| C | -4.229213 | -3.905492 | -0.220005 |
| H | -3.151297 | -3.916723 | -0.362314 |
| H | -4.475087 | -4.480366 | 0.674750  |
| H | -4.706157 | -4.372964 | -1.083251 |
| C | 0.136511  | 5.875498  | 0.199564  |
| H | -0.456218 | 5.984523  | -0.707406 |
| H | -0.555237 | 5.808529  | 1.037657  |
| H | 0.784390  | 6.741448  | 0.323103  |
| C | 5.838295  | -2.226600 | -0.312521 |
| H | 5.814439  | -2.999598 | -1.082082 |
| H | 6.625945  | -1.506782 | -0.539914 |
| H | 6.048246  | -2.692563 | 0.654164  |
| H | -0.105692 | 0.724425  | -0.335061 |
| H | 4.049293  | 1.204536  | -0.047842 |
| H | -2.128785 | 1.765105  | -0.110802 |
| C | 2.368100  | -3.903112 | 1.701263  |
| H | 2.630515  | -4.196288 | 2.718346  |
| H | 1.345782  | -3.514357 | 1.698536  |
| H | 2.418726  | -4.775446 | 1.045677  |

48

1FFK\_cosmo E = -1739.08142271 A.U.

|   |           |           |           |
|---|-----------|-----------|-----------|
| O | 3.073936  | -2.495099 | 1.271758  |
| P | 3.256675  | -2.144447 | -0.315577 |
| O | 4.690371  | -1.362872 | -0.349436 |
| O | 2.246500  | -1.070251 | -0.640815 |
| O | 3.312880  | -3.411713 | -1.118210 |
| N | 0.361343  | 4.790121  | 0.168303  |
| C | -0.104074 | 3.481833  | -0.040332 |
| O | -1.328511 | 3.296288  | -0.109889 |
| N | 0.798051  | 2.483459  | -0.157210 |
| C | 2.109172  | 2.719581  | -0.071876 |

|   |           |           |           |
|---|-----------|-----------|-----------|
| N | 2.950681  | 1.689891  | -0.194354 |
| C | 2.606828  | 4.042598  | 0.144199  |
| C | 1.695009  | 5.034530  | 0.255338  |
| N | -2.590193 | 0.671059  | -0.155440 |
| C | -1.768487 | -0.409200 | -0.382917 |
| N | -0.483156 | -0.136824 | -0.646483 |
| N | -2.205938 | -1.660089 | -0.371298 |
| C | -3.524372 | -1.754187 | -0.120402 |
| C | -4.438639 | -0.732060 | 0.118459  |
| C | -3.969614 | 0.616900  | 0.110675  |
| O | -4.603811 | 1.655391  | 0.300077  |
| N | -5.702892 | -1.250842 | 0.334005  |
| C | -5.547070 | -2.543307 | 0.226886  |
| N | -4.247993 | -2.915091 | -0.048368 |
| H | 2.627779  | 0.729211  | -0.348212 |
| H | 3.664643  | 4.246534  | 0.214752  |
| H | 1.981266  | 6.065358  | 0.418363  |
| H | 0.202176  | -0.881237 | -0.670571 |
| H | -6.325181 | -3.284527 | 0.334335  |
| C | -3.739202 | -4.262924 | -0.226271 |
| H | -3.297432 | -4.375957 | -1.215275 |
| H | -2.981515 | -4.487353 | 0.523342  |
| H | -4.563778 | -4.963488 | -0.121167 |
| C | -0.621831 | 5.864072  | 0.292422  |
| H | -1.228357 | 5.924241  | -0.608985 |
| H | -1.281225 | 5.674696  | 1.137170  |
| H | -0.095013 | 6.802450  | 0.442449  |
| C | 5.898501  | -2.061763 | -0.042590 |
| H | 5.969571  | -2.990131 | -0.610952 |
| H | 6.725263  | -1.408514 | -0.313983 |
| H | 5.957991  | -2.282892 | 1.025146  |
| H | -0.099559 | 0.797941  | -0.494711 |
| H | 3.943876  | 1.850121  | -0.133622 |
| H | -2.169413 | 1.608266  | -0.163730 |
| C | 3.237712  | -3.824538 | 1.774710  |
| H | 2.914555  | -3.807790 | 2.813802  |
| H | 2.629934  | -4.532759 | 1.213172  |
| H | 4.280456  | -4.142402 | 1.730554  |

51

3CCL\_gas E = -795.783361835 A.U.

|   |           |           |           |
|---|-----------|-----------|-----------|
| C | 3.050545  | -2.625331 | 1.696740  |
| O | 3.870866  | -2.755184 | 0.543692  |
| P | 3.980946  | -1.502131 | -0.510026 |
| C | 6.267869  | -0.645839 | 0.494453  |
| O | 4.872411  | -0.406413 | 0.364485  |
| O | 2.626008  | -0.837736 | -0.615026 |
| O | 4.760247  | -1.978529 | -1.681746 |
| C | -1.571679 | 5.324510  | 0.252704  |
| N | -0.413813 | 4.433954  | 0.232019  |
| C | -0.557567 | 3.160125  | -0.366729 |

|   |           |           |           |
|---|-----------|-----------|-----------|
| O | -1.649636 | 2.867670  | -0.866712 |
| N | 0.495290  | 2.322494  | -0.359782 |
| C | 1.665595  | 2.664673  | 0.180793  |
| N | 2.652359  | 1.777582  | 0.171391  |
| C | 1.846836  | 3.968061  | 0.761355  |
| C | 0.780549  | 4.797692  | 0.763399  |
| C | -2.514710 | -5.052803 | 0.140727  |
| N | -2.431203 | -0.047378 | -0.450906 |
| C | -1.420667 | -0.967724 | -0.640839 |
| N | -0.240419 | -0.494095 | -1.063205 |
| N | -1.596487 | -2.265091 | -0.443466 |
| C | -2.842129 | -2.572306 | -0.051871 |
| C | -3.928493 | -1.732251 | 0.179900  |
| C | -3.747083 | -0.325512 | -0.017670 |
| O | -4.556610 | 0.582347  | 0.140226  |
| N | -5.032394 | -2.461471 | 0.579336  |
| C | -4.622532 | -3.697508 | 0.586411  |
| N | -3.299051 | -3.839438 | 0.208769  |
| O | -4.380223 | 3.471371  | -0.088629 |
| H | 3.426072  | -1.844696 | 2.365424  |
| H | 6.725724  | -0.812106 | -0.481470 |
| H | 6.461741  | -1.518683 | 1.124757  |
| H | -1.825764 | 5.642807  | -0.758324 |
| H | 3.538745  | 1.997535  | 0.588527  |
| H | 2.787624  | 4.270844  | 1.193730  |
| H | 0.823798  | 5.789350  | 1.192185  |
| H | -1.904206 | -5.184096 | 1.036136  |
| H | 0.577488  | -1.090773 | -1.014619 |
| H | -5.220549 | -4.557315 | 0.845818  |
| H | -4.588043 | 2.540852  | 0.098004  |
| H | -3.540773 | 3.390347  | -0.561002 |
| H | -3.182152 | -5.906719 | 0.036557  |
| H | -1.849734 | -5.005847 | -0.719113 |
| H | -2.436777 | 4.811913  | 0.668563  |
| H | -1.328993 | 6.196561  | 0.856460  |
| H | 6.709302  | 0.234372  | 0.964868  |
| H | 2.021434  | -2.388502 | 1.423869  |
| H | 3.077875  | -3.581924 | 2.219255  |
| H | -2.224524 | 0.935418  | -0.633151 |
| H | -0.035439 | 0.498727  | -0.972596 |
| H | 2.549266  | 0.805068  | -0.189141 |

51

3CC1\_cosmo E = -1815.56217016 A.U.

|   |           |           |           |
|---|-----------|-----------|-----------|
| C | 4.189198  | -0.809332 | 2.225935  |
| O | 4.078292  | -1.906433 | 1.314301  |
| P | 3.787008  | -1.620920 | -0.267669 |
| C | 6.385726  | -1.513079 | -0.789815 |
| O | 5.129929  | -0.827891 | -0.753312 |
| O | 2.672786  | -0.610528 | -0.416211 |
| O | 3.680825  | -2.968195 | -0.915892 |
| C | -1.855703 | 5.390971  | 0.076240  |

|   |           |           |           |
|---|-----------|-----------|-----------|
| N | -0.632460 | 4.589646  | 0.083888  |
| C | -0.724080 | 3.222177  | -0.199242 |
| O | -1.843567 | 2.737029  | -0.448844 |
| N | 0.396839  | 2.475580  | -0.191774 |
| C | 1.588122  | 3.016798  | 0.075858  |
| N | 2.662166  | 2.224420  | 0.072550  |
| C | 1.712551  | 4.412658  | 0.358719  |
| C | 0.578593  | 5.148006  | 0.351015  |
| C | -2.205731 | -5.211083 | 0.049035  |
| N | -2.458185 | -0.156028 | -0.211037 |
| C | -1.364206 | -0.981679 | -0.363560 |
| N | -0.199100 | -0.383905 | -0.645662 |
| N | -1.442504 | -2.299994 | -0.266454 |
| C | -2.687079 | -2.738425 | -0.010775 |
| C | -3.850693 | -1.992652 | 0.160532  |
| C | -3.768034 | -0.574583 | 0.062189  |
| O | -4.679991 | 0.251249  | 0.189478  |
| N | -4.928664 | -2.822406 | 0.410308  |
| C | -4.423072 | -4.026182 | 0.388292  |
| N | -3.066685 | -4.045217 | 0.137749  |
| O | -4.684216 | 3.046604  | -0.360790 |
| H | 5.035282  | -0.169896 | 1.966974  |
| H | 6.327789  | -2.394361 | -1.429191 |
| H | 6.694528  | -1.816337 | 0.212483  |
| H | -2.275864 | 5.431980  | -0.927649 |
| H | 3.567207  | 2.618365  | 0.278314  |
| H | 2.668785  | 4.865001  | 0.574909  |
| H | 0.577904  | 6.210113  | 0.557916  |
| H | -1.436935 | -5.177817 | 0.819787  |
| H | 0.664476  | -0.911753 | -0.595046 |
| H | -4.970829 | -4.943916 | 0.543900  |
| H | -4.749268 | 2.103803  | -0.130731 |
| H | -3.730651 | 3.161711  | -0.482175 |
| H | -2.811822 | -6.102828 | 0.187223  |
| H | -1.723365 | -5.253571 | -0.926303 |
| H | -2.594211 | 4.951568  | 0.742656  |
| H | -1.614313 | 6.396616  | 0.408835  |
| H | 7.116826  | -0.816391 | -1.194282 |
| H | 3.276712  | -0.212351 | 2.228963  |
| H | 4.349768  | -1.232275 | 3.215288  |
| H | -2.304108 | 0.853207  | -0.295387 |
| H | -0.082361 | 0.624513  | -0.533000 |
| H | 2.603481  | 1.217502  | -0.111783 |

.....

Modeled geometries:

50

1N78\_nowater E = -1470.82602127 A.U.

|   |           |           |          |
|---|-----------|-----------|----------|
| N | -0.541131 | -2.278843 | 0.205544 |
| C | 0.090778  | -1.331253 | 0.955969 |

|   |           |           |           |
|---|-----------|-----------|-----------|
| N | -0.693501 | -0.462462 | 1.636845  |
| N | 1.408302  | -1.247708 | 1.064967  |
| C | 2.051796  | -2.261729 | 0.428757  |
| C | 1.509068  | -3.270531 | -0.358205 |
| C | 0.084062  | -3.319524 | -0.543649 |
| O | -0.594342 | -4.085111 | -1.198030 |
| N | 2.498164  | -4.113257 | -0.816747 |
| C | 3.597530  | -3.630265 | -0.312574 |
| N | 3.398165  | -2.502024 | 0.459724  |
| N | 3.344191  | 3.154971  | -0.915778 |
| C | 3.167165  | 1.869710  | -0.395439 |
| O | 3.965714  | 0.984726  | -0.621924 |
| N | 2.036073  | 1.700558  | 0.378002  |
| C | 1.087602  | 2.671844  | 0.682643  |
| O | 0.114232  | 2.408783  | 1.385705  |
| C | 1.356730  | 3.970617  | 0.109737  |
| C | 2.452362  | 4.153020  | -0.652186 |
| N | -5.235385 | -0.233295 | -0.536111 |
| C | -3.930139 | -0.483020 | -0.041798 |
| O | -3.532085 | -1.640764 | 0.000319  |
| N | -3.191953 | 0.582536  | 0.362251  |
| C | -3.659841 | 1.816537  | 0.295256  |
| N | -2.858331 | 2.817798  | 0.703458  |
| C | -4.976177 | 2.093669  | -0.192405 |
| C | -5.714220 | 1.030182  | -0.592701 |
| H | -1.610663 | -0.247099 | 1.252833  |
| H | 4.586782  | -4.036316 | -0.452831 |
| H | 0.670366  | 4.775815  | 0.309592  |
| H | 2.685068  | 5.109680  | -1.097941 |
| H | -3.177505 | 3.767402  | 0.673153  |
| H | -5.371154 | 3.095565  | -0.247348 |
| H | -6.718134 | 1.141697  | -0.977833 |
| H | -1.558449 | -2.245675 | 0.145270  |
| H | -0.214629 | 0.354152  | 1.984973  |
| H | -1.908464 | 2.632033  | 1.005202  |
| H | 1.885523  | 0.737842  | 0.721047  |
| C | 4.399367  | -1.766290 | 1.208183  |
| H | 4.577770  | -0.790911 | 0.760730  |
| H | 4.068571  | -1.634767 | 2.237891  |
| H | 5.323482  | -2.340642 | 1.206196  |
| C | -6.020344 | -1.385510 | -0.971124 |
| H | -5.494028 | -1.917828 | -1.760572 |
| H | -6.163624 | -2.074934 | -0.141577 |
| H | -6.984084 | -1.037721 | -1.335073 |
| C | 4.528704  | 3.370620  | -1.745036 |
| H | 5.433337  | 3.192859  | -1.166764 |
| H | 4.524992  | 2.685272  | -2.589717 |
| H | 4.517875  | 4.396124  | -2.103425 |

50

GCU\_1N78\_nowater\_cosmo E = -1470.86878659 A.U.

|   |          |          |          |
|---|----------|----------|----------|
| N | 2.677442 | 0.957423 | 0.065439 |
| C | 1.331026 | 1.229506 | 0.107672 |

|   |           |           |           |
|---|-----------|-----------|-----------|
| N | 0.507131  | 0.176601  | 0.196934  |
| N | 0.842262  | 2.460539  | 0.077520  |
| C | 1.799550  | 3.403536  | 0.006626  |
| C | 3.180690  | 3.237378  | -0.038532 |
| C | 3.708707  | 1.910756  | -0.010447 |
| O | 4.884482  | 1.547062  | -0.043529 |
| N | 3.815839  | 4.464260  | -0.107902 |
| C | 2.842772  | 5.335668  | -0.104309 |
| N | 1.592838  | 4.756745  | -0.036769 |
| N | -6.150887 | 0.003895  | -0.012184 |
| C | -5.196685 | 1.012607  | 0.000773  |
| O | -5.490853 | 2.193901  | -0.001968 |
| N | -3.891203 | 0.566814  | 0.016777  |
| C | -3.445826 | -0.748703 | 0.021101  |
| O | -2.235771 | -0.984622 | 0.036906  |
| C | -4.501591 | -1.724496 | 0.006173  |
| C | -5.787227 | -1.313277 | -0.009331 |
| N | 3.237314  | -4.089115 | -0.005300 |
| C | 2.663814  | -2.808776 | 0.043541  |
| O | 3.420728  | -1.829562 | 0.112518  |
| N | 1.316378  | -2.698002 | 0.014430  |
| C | 0.540032  | -3.779710 | -0.059935 |
| N | -0.786726 | -3.611348 | -0.085047 |
| C | 1.098610  | -5.093498 | -0.112082 |
| C | 2.446842  | -5.190524 | -0.081589 |
| H | 0.838471  | -0.786105 | 0.135565  |
| H | 2.955382  | 6.408861  | -0.148298 |
| H | -4.252794 | -2.773819 | 0.009068  |
| H | -6.607893 | -2.018865 | -0.020166 |
| H | -1.393994 | -4.413996 | -0.140134 |
| H | 0.476131  | -5.973420 | -0.172642 |
| H | 2.957738  | -6.143864 | -0.116218 |
| H | 2.970735  | -0.027088 | 0.088295  |
| H | -0.489640 | 0.322171  | 0.156023  |
| H | -1.210802 | -2.689839 | -0.044500 |
| H | -3.181975 | 1.297076  | 0.025854  |
| C | 0.309940  | 5.435472  | -0.011608 |
| H | -0.304953 | 5.118703  | -0.852811 |
| H | -0.221458 | 5.214609  | 0.913221  |
| H | 0.480771  | 6.506999  | -0.077908 |
| C | 4.694728  | -4.195443 | 0.027813  |
| H | 5.129239  | -3.666593 | -0.818044 |
| H | 5.082713  | -3.754575 | 0.943817  |
| H | 4.967792  | -5.246115 | -0.017380 |
| C | -7.556557 | 0.414940  | -0.029423 |
| H | -7.782923 | 1.011633  | 0.851628  |
| H | -7.761842 | 1.010139  | -0.916665 |
| H | -8.175040 | -0.477435 | -0.036052 |

---

H2U to U modification

74

H2UtoU\_gasphase E = -949.555230329 A.U.

|   |           |           |           |
|---|-----------|-----------|-----------|
| N | -2.737259 | 2.375545  | -0.179334 |
| C | -2.783022 | 1.013121  | -0.207806 |
| N | -1.945760 | 0.390912  | -1.071447 |
| N | -3.611126 | 0.301033  | 0.541319  |
| C | -4.374861 | 1.070943  | 1.359769  |
| C | -4.384680 | 2.456869  | 1.482606  |
| C | -3.502124 | 3.234189  | 0.659084  |
| O | -3.335829 | 4.437806  | 0.603606  |
| N | -5.284450 | 2.853902  | 2.447436  |
| C | -5.796578 | 1.742448  | 2.891298  |
| N | -5.287370 | 0.616645  | 2.272847  |
| N | -2.941136 | -4.357909 | -1.448141 |
| C | -2.827656 | -3.086456 | -0.893814 |
| O | -1.732301 | -2.553700 | -0.773235 |
| N | -4.004008 | -2.500007 | -0.508190 |
| C | -5.291943 | -3.040181 | -0.640890 |
| O | -6.271713 | -2.425363 | -0.261241 |
| C | -5.316411 | -4.359471 | -1.245660 |
| C | -4.167199 | -4.950828 | -1.612209 |
| C | 5.462540  | -0.365667 | 1.689008  |
| O | 5.240803  | -0.447640 | 0.283692  |
| C | 6.631076  | -1.285708 | 1.970737  |
| O | 5.995908  | -2.515438 | 2.294691  |
| C | 7.356263  | -1.359958 | 0.613719  |
| O | 8.110265  | -2.587713 | 0.512417  |
| C | 6.194087  | -1.340685 | -0.327085 |
| N | 1.414003  | 4.178994  | -1.686195 |
| C | 0.487481  | 3.109855  | -1.729054 |
| O | -0.681631 | 3.366943  | -2.001835 |
| N | 0.936744  | 1.858834  | -1.456890 |
| C | 2.207425  | 1.642582  | -1.160269 |
| N | 2.583379  | 0.376834  | -0.894202 |
| C | 3.170344  | 2.699042  | -1.127385 |
| C | 2.713552  | 3.946152  | -1.394795 |
| H | -1.156184 | 0.910411  | -1.430443 |
| H | -6.548033 | 1.656916  | 3.660213  |
| H | -3.922705 | -1.552185 | -0.096788 |
| H | -6.269861 | -4.841359 | -1.382464 |
| H | -4.144399 | -5.934209 | -2.059695 |
| H | 4.575216  | -0.571177 | 2.242764  |
| H | 7.279268  | -0.981547 | 2.790897  |
| H | 8.004061  | -0.488191 | 0.489141  |
| H | 8.920513  | -2.405563 | 0.029959  |
| H | 5.793441  | -2.357859 | -0.379531 |
| H | 3.508120  | 0.149183  | -0.555687 |
| H | 4.207774  | 2.518237  | -0.898421 |
| H | 3.362068  | 4.810912  | -1.385329 |
| C | -1.706293 | -5.012897 | -1.870469 |
| H | -1.214710 | -4.434340 | -2.650704 |
| H | -1.020715 | -5.103991 | -1.030580 |
| H | -1.951512 | -6.001008 | -2.249780 |
| C | -5.628877 | -0.763128 | 2.561911  |



|   |           |           |           |
|---|-----------|-----------|-----------|
| H | -6.032742 | -1.255364 | 1.679392  |
| H | -4.748888 | -1.308564 | 2.905572  |
| H | -6.376174 | -0.773441 | 3.352491  |
| C | 0.898759  | 5.523149  | -1.940690 |
| H | 0.495987  | 5.585481  | -2.949677 |
| H | 0.094298  | 5.748228  | -1.243946 |
| H | 1.709008  | 6.237958  | -1.819864 |
| C | 5.718450  | 1.086977  | 2.037623  |
| H | 4.882253  | 1.704003  | 1.705768  |
| H | 5.804506  | 1.206494  | 3.119770  |
| H | 6.627715  | 1.485187  | 1.581557  |
| C | 4.603740  | -2.430478 | 1.979182  |
| H | 4.315742  | -3.490952 | 1.937658  |
| H | 3.998727  | -2.038664 | 2.796701  |
| H | 4.315923  | -2.031488 | 1.022948  |
| H | -1.802990 | -0.601175 | -0.925532 |
| H | 1.863642  | -0.324821 | -0.866692 |
| H | -2.093003 | 2.844100  | -0.816843 |
| C | 6.331872  | -0.760295 | -1.718271 |
| H | 7.005394  | -1.357182 | -2.337091 |
| H | 5.361017  | -0.742777 | -2.210893 |
| H | 6.716426  | 0.258650  | -1.669285 |
